# Supplementary material for: Ongoing repair of migration-coupled DNA damage allows planarian adult stem cells to reach wound sites
Source: eLife journal article supplement (doi:10.7554/elife.63779), 2021-04-23
Supplement: fig1-data1 [file Fig1_sourcedata_1_PanelB.xlsx]

## Sheet: Fig. 1B
Repopulation kinetics of smedwi-1+ cells/ mm2 after different dose of IR and at different time points post IR
		0 Gy					15 Gy					5 Gy					10 Gy
	3hr	2368.86	2357.79	2335.65	2623.46	2964.2	2361.25	2015.44	2822.11	2817.12	2321.03	2744.63	2638.11	2589.85	2987.43	3001.26	2193.58	2389.6	2509.15	2413.78	2115.88
	1dpi	2368.86	2125.33	2069.99	2092.13	2457.42	259.136	517.015	410.881	520.471	392.62	1820.68	1820.99	1959.57	1768.01	1512.63	874.875	1165.67	720.597	888.326	756.109
	3dpi	2191.75	2224.96	2324.59	2114.26	1959.29	105.204	83.068	128.153	121.063	136.984	1349.07	1429.29	1097.78	1090.21	1628.71	206.647	390.79	466.045	207.808	381.049
	7dpi	2017.21	2562.12	2391.23	2265.41	2109.65	1020.51	903.199	221.696	389.91	752.17	2316.65	2215.42	2482.12	2424.91	2344.93	1500.63	1175.23	1531.63	1220.11	1309.13
	14dpi	2235.78	2432.87	2167.98	2032.65	2068.76	1482.48	983.936	802.65	1035.27	1125.98						2042.34	2117.98	2097.39	2178.22	1173.25
	21dpi	2465.12	2517.23	2212.23	1876.23	1962.12	2563.94	2348.63	2387.12	2412.09	2176.14						2189.86	2312.76	2298.17	2119.1	2578.18
