# Supplementary material for: Ongoing repair of migration-coupled DNA damage allows planarian adult stem cells to reach wound sites
Source: eLife journal article supplement (doi:10.7554/elife.63779), 2021-04-23
Supplement: fig1-data1 [file Fig1_sourcedata_2_PanelD.xlsx]

## Sheet: Fig. 1D
COMET assay data 24 hours post IR
n=100	101	100	100
0Gy	5Gy	15Gy	30Gy
15.61	29.96	9.01	46.95
11.53	12.06	48.13	23.85
14.74	26.83	53.51	38.77
16.82	22.88	13.49	39.63
10.61	25.9	25.03	46.9
5.33	25.64	30.44	29.57		Statistics
7.45	21.95	18.38	53.68
7.21	25.12	45.21	26.31		Tukey's multiple comparisons test	Mean Diff.	95.00% CI of diff.	Significant?	Summary	Adjusted P Value
3.62	41.02	69.41	41.64		0Gy vs. 5Gy	-23.49	-29.79 to -17.20	Yes	****	<0.0001
8.38	45.98	69.13	72.1		0Gy vs. 15Gy	-43.09	-49.40 to -36.78	Yes	****	<0.0001
9.38	22.14	37.95	78.04		0Gy vs. 30Gy	-45.02	-51.33 to -38.71	Yes	****	<0.0001
9.76	45.27	47.17	41.04		5Gy vs. 15Gy	-19.59	-25.89 to -13.30	Yes	****	<0.0001
6.04	44.4	33.05	76.79		5Gy vs. 30Gy	-21.53	-27.82 to -15.23	Yes	****	<0.0001
8.6	66.29	33.02	33.37		15Gy vs. 30Gy	-1.933	-8.246 to 4.380	No	ns	0.8589
8.88	17.55	63.97	15.83
13.67	6.14	63.8	32.07
9.36	9.65	49.49	44.72
7.08	8.73	49.67	46.9
6.11	12.35	10.39	18.52
4.98	39.85	32.93	20.52
7.85	12.72	21.27	40.6
7.45	56.84	21.27	39.98
18.06	32.6	51.63	68.38
7.21	35.51	44.85	69.75
5.58	4.72	36.88	75.57
5.1	52.42	52.97	51.78
3.02	59.07	35.57	65.33
6.77	10.07	57.75	56.1
10.03	60.04	44.27	31.07
5.4	66.2	79.86	21.85
12.43	47.16	88.95	29.9
6.42	55.45	54.95	20.87
17.77	16.79	71.11	65.58
9.54	5.92	70.29	19.48
3.33	15.73	51.52	32.29
7.48	54.82	52.09	67.56
7.34	37.8	46.81	76.71
11.25	35.9	57.38	54.16
13.31	51.97	42.95	35.52
15.18	64.28	58.34	53.89
16.68	50.96	66.08	57.86
9.93	4.54	36.89	58.53
7.34	44.44	60.51	53.98
6.79	30.88	57.72	28.98
19.79	42.05	52.09	15.56
3.28	8.08	49.35	19.51
4.81	5.21	7.52	19.99
2.4	35.93	43.58	22.63
5.94	34.35	55.84	70.19
20.53	49.76	54.5	62.95
3.03	62.36	62.6	35.59
3.05	37.56	54.84	56.87
5.61	48.42	47.32	27.35
6.31	66.4	22.07	76.41
7.76	20.76	36.39	19.62
4.54	44.06	46.42	47.5
9.47	18.96	55.16	38.85
1.86	34.16	68.36	83.07
19.9	27.16	69.52	78.65
12.57	35.93	58.3	65.88
3.14	32.22	34.6	39.95
1.64	26.63	23.28	60.88
5.1	26.05	20.93	52.34
6.27	59.01	64.83	57.52
7.64	25.21	84.86	45.35
7.83	22.29	52.09	28.54
11.57	39.7	44.1	45.26
7.12	45.59	69.21	21.71
12.92	20.95	79.84	44.77
14.08	30.98	81.86	78.11
13.64	46	79.17	73.93
12.75	9.21	48.75	81.99
13.48	16.93	61.76	88.9
8.22	10.19	79.74	90.92
15.05	31.59	79.38	75.24
5.8	7.99	55.88	82.47
19.7	25.67	72.03	54.07
6.07	17.24	69.39	73.33
10.63	75.13	43.21	92.57
20.96	76.98	52.57	83.95
13.89	74.37	49.27	60.53
13.25	34.68	77.36	81.88
9.63	41.36	66.5	90.44
15.59	30.76	79.86	65.56
2.78	19.76	58.47	81.69
17.43	12.89	65.42	60.88
13.87	15.09	51.46	87.08
8.47	23.28	55.08	96.5
9.8	25.38	63.8	89.53
38.63	17.65	63.69	65.29
5.93	32.25	50.72	78.69
8.63	26.86	78.71	64.03
10.22	43.49	39.55	28.48
3.61	39.1	27.68	78.39
5.27	57.91	45.9	81.96
4.34	6.4	75.77	61.13
1.98	42.28	74.95	85.03
8.66	34.65	61.03	65.9
2.67	42.59	44.65	54.63
5.75	9.87	73.83	50.51
	19.75
