# Supplementary material for: Ongoing repair of migration-coupled DNA damage allows planarian adult stem cells to reach wound sites
Source: eLife journal article supplement (doi:10.7554/elife.63779), 2021-04-23
Supplement: fig1-data1 [file Fig1_sourcedata_3_panelFandG.xlsx]

## Sheet: Fig. 1F and G
PAR fluorescence in individual cells normalized to area.(5 mins post irradiation)
Fig. 1F			Fig. 1G
TUDor1 + cells			Tudor1 - Cells
0Gy	5 mins		0Gy	5 mins		TUDor1 + cells
3.41912	11.8668		4.45903	24.937		Unpaired t test
2.26098	17.9332		6.5573	14.2947		P value	<0.0001
3.71628	8.1082		1.87409	9.37118		P value summary	****
3.72214	9.40209		8.47934	13.7606		Significantly different (P < 0.05)?	Yes
2.11082	17.2766		3.60332	28.674
3.72477	23.9286		8.16127	19.4903
6.6021	9.56442		4.70597	13.0564
5.31893	9.50075		6.35246	26.7606
3.51095	13.4373		5.62765	36.4256		Tudor1 - Cells
4.17071	11.9821		9.14147	48.1409		Unpaired t test
4.65542	15.4102		3.01622	23.945		P value	<0.0001
10.6204	20.2701		3.58712	29.6125		P value summary	****
3.80786	21.5794		3.0223	22.7061		Significantly different (P < 0.05)?	Yes
2.29756	13.0508		3.34679	27.2728
3.58885	25.0776		3.31852	10.587
5.43218	8.13657		2.20459	22.1146
4.20368	23.6132		2.47258	68.1137
4.88096	19.1577		3.75886	25.8904
3.19847	22.475		1.9591	25.7957
4.99738	14.7813		7.54362	32.7243
2.5848	23.912		8.97936	16.3361
2.85699	16.782		5.52188	15.6254
1.73792	13.5689		3.06826	46.5869
1.71877	13.6635		4.89403	34.7347
1.68954	10.2042		2.735	49.4057
2.30532	8.16398		1.48461	53.1132
1.6099	15.9335		0.734356	23.0881
1.86045	39.1932		2.80505	15.0743
1.71132	29.4644		3.60641	24.1243
3.23893	9.14792		2.68545	51.7312
2.57224	34.1932		4.02228	64.903
0.998289	18.3423		1.47949	37.3856
1.97081	16.7011		2.44394	17.7094
1.54655	37.7509		1.27514	13.9713
1.02674	17.4929		1.31651	22.297
1.55215	43.6682		2.01187	20.6042
2.56783	27.2814		2.02437	28.9152
2.21314	48.892		1.38155	18.2523
2.43311	31.3633		1.64196	22.7412
2.52641	24.0943		1.08752	26.0371
1.6163	47.007		0.922936	18.0202
2.22362	28.4971		1.64843	24.0442
1.37272	13.2991		1.50492	28.7333
1.59914	42.5461		1.94588	53.4428
1.90191	45.4624		1.11653	46.6389
1.75252	16.2406		1.84498	38.4012
1.71921	16.4377		0.873999	57.6613
1.49025	16.0697		1.12297	51.3309
2.1454	53.0839		1.8411	24.2684
1.73135	41.2886		1.94045	31.0418
1.84994	26.1187		3.08153	29.5317
2.41784	23.7457		1.69632	28.1847
2.23394	44.9639		2.08865	47.5697
3.86969	20.8858		2.47749	18.8008
5.73202	16.5809		1.37827	25.5327
6.83531	21.4613		3.67189	15.5044
4.40525	22.7517		8.17847	48.4537
5.54629	31.2482		8.33913	48.6628
6.26166	6.67412		5.77835	54.6317
6.51387	31.6131		4.68894	51.6034
8.35334	43.4038		7.50044	35.1128
5.73753	19.7132		5.67219	57.471
5.57304	14.8513		7.09842	19.0777
4.39447	20.8011		10.0378	10.2052
3.92396	34.0973		13.7671	43.1851
4.14116	16.7016		5.64157	8.30986
3.1883	16.8155		3.23018	18.8447
3.31516	15.3221		6.76195	31.918
3.68684	21.5076		3.70827	39.5147
4.03803	21.9893		5.62927	38.0891
3.14582	20.3578		4.78487	45.8973
3.64223	24.2845		4.5346	30.8255
4.21638	17.5672		4.20833	17.1553
3.24873			5.86534	25.9975
2.66996			4.53411	31.9362
2.70611			4.96694	28.846
4.72476			4.31533	32.0123
4.14052			3.43011	19.4566
2.6843			3.76793	12.7294
4.56372			6.36091	20.5833
3.61605			4.34922	11.6341
6.49226			3.84052	15.4512
5.43463			8.74146	26.1083
7.30543			2.96852	40.1721
5.04808			3.236	19.3861
3.55042			3.86792	25.2412
6.12363			5.27566	19.3497
6.60458			4.67872	40.224
5.99119			3.26259	21.9269
6.15113			3.94507	23.2203
5.99875			9.01568	17.7797
			4.59475	21.5444
			4.68257	17.9981
			3.75915	17.719
			8.92771
			4.53967
			6.68957
			9.50054
			2.33785
			7.26096
			6.80058
			3.63018
			3.11117
			5.24695
			7.68656
			4.44271
			5.30562
			9.03103
			8.32331
			9.24614
			6.51221
			7.90441
			8.22123
			7.57467
