# Supplementary material for: Ongoing repair of migration-coupled DNA damage allows planarian adult stem cells to reach wound sites
Source: eLife journal article supplement (doi:10.7554/elife.63779), 2021-04-23
Supplement: fig1-data1 [file Fig1_sourcedata_4_panelI.xlsx]

## Sheet: Fig. 1I
Fig. 1-I
smedwi+ cells after RNAi of DDR genes and 15 Gy exposure to IR
Control	atr	atm	brca2	rad51	fanc J	parp1	parp2	parp3
336.286	71.0457	168.54	10.23	2.79943	84.677	69.2091	0	108.392
251.146	60.0334	202.337	5.62	10.234	154.246	71.4583	0	91.047
330.626	125.108	185.96	2.34	0	5.345	41.2787	10.1315	65.5439
266.212	68.92	170.986	0	0	21.1161	23.6467	6.07693	197.088
277.666	52.67	212.682	0	0	10.234	138.365	28.8015	30.5949
Tukey's multiple comparisons test	Mean Diff.	95.00% CI of diff.		Summary	Adjusted P Value
Control vs. atr	216.8	138.3 to 295.4		****	<0.0001
Control vs. atm	104.3	25.77 to 182.8		**	0.0028
Control vs. brca2	288.7	210.2 to 367.3		****	<0.0001
Control vs. rad51	289.8	211.3 to 368.3		****	<0.0001
Control vs. fanc J	237.3	158.7 to 315.8		****	<0.0001
Control vs. parp1	223.6	145.1 to 302.1		****	<0.0001
Control vs. parp2	283.4	204.9 to 361.9		****	<0.0001
Control vs. parp3	193.9	115.3 to 272.4		****	<0.0001
