# Supplementary material for: Ongoing repair of migration-coupled DNA damage allows planarian adult stem cells to reach wound sites
Source: eLife journal article supplement (doi:10.7554/elife.63779), 2021-04-23
Supplement: fig1-figsupp1-data1 [file Fig1_sourcedata_5_Panel B.xlsx]

## Sheet: Panel B
Survival curve
Absolute numbers
N=15 worms per condition
Replicate-1								For Graphs-percentage distribution
Days	0 Gy	5 Gy	10 Gy	15 Gy	20 Gy	30 Gy		Days	15 Gy	20 Gy	30 Gy
1	15	15	15	15	15	15
3	15	15	15	15	15	15		1	100	100	100
5	15	15	15	15	15	15		3	100	100	100
7	15	15	15	15	15	15		5	100	100	100
10	15	15	15	15	15	15		7	100	100	100
12	15	15	15	15	15	15		10	100	100	100
14	15	15	15	15	15	15		12	100	100	100
16	15	15	15	15	15	15		14	100	100	100
18	15	15	15	15	15	15		16	100	100	100
20	15	15	15	15	15	15		18	100	100	100
22	15	15	15	15	15	14		20	100	100	100
25	15	15	15	15	15	10		22	100	100	93
28	15	15	15	15	15	8		25	100	100	65
30	15	15	15	15	14	3		28	100	100	50
32	15	15	15	15	13	0		30	100	93	20
35	15	15	15	15	11	0		32	100	85	0
38	15	15	15	15	8	0		35	100	75	0
42	15	15	15	15	5	0		38	100	50	0
45	15	15	15	15	2	0		42	100	32	0
47	15	15	15	15	1	0		45	100	15	0
52	15	15	15	15	0	0		47	100	10	0
								52	100	0	0
Replicate-2
n=20 worms per condition
Days	0 Gy	5 Gy	10 Gy	15 Gy	20 Gy	30 Gy
1	20	20	20	20	20	20
3	20	20	20	20	20	20
5	20	20	20	20	20	20
7	20	20	20	20	20	20
10	20	20	20	20	20	20
12	20	20	20	20	20	20
15	20	20	20	20	20	20
18	20	20	20	20	19	15
22	20	20	20	20	19	13
25	20	20	20	20	17	13
27	20	20	20	20	17	10
30	20	20	20	20	17	9
33	20	20	20	20	14	9
37	20	20	20	20	12	5
40	20	20	20	20	12	0
43	20	20	20	20	10	0
47	20	20	20	20	5	0
50	20	20	20	20	4	0
52	20	20	20	20	4	0
55	20	20	20	18	2	0
60	20	20	20	19	0	0
