# Supplementary material for: Ongoing repair of migration-coupled DNA damage allows planarian adult stem cells to reach wound sites
Source: eLife journal article supplement (doi:10.7554/elife.63779), 2021-04-23
Supplement: fig1-figsupp1-data1 [file Fig1_sourcedata_6_Panel D.xlsx]

## Sheet: Panel D
Kinetics of H3P ser10 after different dose of IR
	O Gy					5 Gy					10 Gy					15 Gy
1 dpi	198.887	188.966	205.479	165.619	178.214	48.9784	47.0385	40.992	44.7556	38.9044	16.0641	18.1037	17.3156	16.0955	17.1295	0.584764	0.68635	0	0	0.745723
3 dpi	179.384	187.336	180.978	171.99	176.78	96.1312	96.0137	102.227	111.201	98.7584	20.7612	20.9174	26.4974	28.1721	24.9309	12.3785	13.3606	18.0801	11.7937	20.5354
5 dpi	163.053	178.029	189.91	188.34	177.34	132.325	129.238	123.657	100.564	120.827	20.748	68.5834	35.8364	31.1235	32.0816	45.8723	40.3662	25.2605	21.9347	35.0092
11 dpi	189	191	192	244.541	209.338	166.107	168.98	198.695	157.34	168.32	153.669	158.843	117.901	116.035	144.611	113.068	77.8028	94.8239	84.3016	79.1875
14dpi	199	185	212.98	266.239		199.1	273.973	198.949	212.149	245.871	148.694	158.209	150.92	170.662	154.998	148.588	116.106	124.568	121.637	116.931
21 dpi	256.761	241.215	202.55	205.363							201.556	223.709	210.004	192.743	192.441	188.596	178.963	266.239	244.541	209.338
