# Supplementary material for: Ongoing repair of migration-coupled DNA damage allows planarian adult stem cells to reach wound sites
Source: eLife journal article supplement (doi:10.7554/elife.63779), 2021-04-23
Supplement: fig1-figsupp2-data1 [file Fig1_source data_7_panel B.xlsx]

## Sheet: Panel B
COMET assay data 24 hours post IR
Percentage of DNA in tail
Day-3					Day-7					Day-11
n=101	101	101	101		n=101	97	101	101		n=101	105	101	101		Statistics
0Gy	5Gy	15Gy	30Gy		0Gy	5Gy	15Gy	30Gy		0Gy	5 Gy	15 Gy	30 Gy		Day3
12.79	9.13	25.1	65.28		9.9	3.54	10.77	5.33		8.47	18.22	11.88	23.69
2.7	27.76	31.66	74.98		1.88	7.31	1.64	4.37		2.8	5.61	2.07	9.21		Tukey's multiple comparisons test	Mean Diff.	95.00% CI of diff.	Significant?	Summary	Adjusted P Value
7.27	2.59	7.27	77.67		3.33	42.89	16.96	10.26		1.9	14.76	14.63	10.37		0Gy vs. 5Gy	-14.76	-20.93 to -8.590	Yes	****	<0.0001
12.06	24.98	47.16	78.11		12.21	13.34	2.46	8.7		0	6.43	5.19	31.83		0Gy vs. 15Gy	-24.17	-30.34 to -18.00	Yes	****	<0.0001
5.3	5.95	33.31	83.62		0.98	27.94	6.15	58.17		11.19	2.6	15.5	12.12		0Gy vs. 30Gy	-61.78	-67.95 to -55.61	Yes	****	<0.0001
0	3.77	48.21	52.82		15.88	1.26	25.27	40.97		11.75	1.44	1.12	4.07
13.01	1.15	24.7	56.29		3.15	0	40.1	66.66		15.46	8.47	5.91	16.52		Test details	Mean 1	Mean 2	Mean Diff.	SE of diff.
23.2	23.37	34.82	78.04		4.16	10.19	19.45	30.75		18.23	9.72	3.12	13.47		0Gy vs. 5Gy	6.595	21.35	-14.76	2.391
25.63	2.41	26.67	82.42		10.52	18.19	5.45	56.92		27.43	12.05	7.04	7.69		0Gy vs. 15Gy	6.595	30.77	-24.17	2.391
0.49	4.99	16.39	79.38		5.16	3.76	6.21	12.12		9.3	10.61	2.82	8.27		0Gy vs. 30Gy	6.595	68.38	-61.78	2.391
13.05	63.89	4.13	66.17		6.61	6.04	5.58	19.87		6.25	8.05	0.87	1.19
0	48.67	40.86	17.66		5.02	2.33	10.18	16		10.21	9.99	8.59	12.71		Day 7
1.08	3.89	68.35	71.05		0.79	36.39	6.82	15.3		4.34	3.85	3.57	55.34
15.29	8.88	6.16	81.28		9.83	0.86	11.81	32.82		4.85	3.46	6.49	20.48		Tukey's multiple comparisons test	Mean Diff.	95.00% CI of diff.	Significant?	Summary	Adjusted P Value
12.23	21.4	2.32	73.57		2.57	5.26	8.67	13.8		13.78	4.46	2.77	4.27		0Gy vs. 5Gy	-3.699	-8.796 to 1.399	No	ns	0.2418
5.78	39.94	39.45	54.89		6.69	4.54	13.33	16.03		15	12.07	5.57	2.67		0Gy vs. 15Gy	-9.539	-14.58 to -4.493	Yes	****	<0.0001
1.61	35.92	42.83	82.99		1.1	16.23	6.55	49.07		3.17	5.11	7.32	41.13		0Gy vs. 30Gy	-18.42	-23.47 to -13.38	Yes	****	<0.0001
12.02	11.84	57.81	69.61		2.07	1.94	5.63	42.8		2.42	5.65	5.97	11.44
4.51	19.77	5.81	86.57		4.29	2.68	19.6	55.51		4.5	13.24	7.67	28.33		Test details	Mean 1	Mean 2	Mean Diff.	SE of diff.
6.87	6.23	14.7	80.33		0.55	28.73	12.48	34.82		0	0.8	6.56	19.54		0Gy vs. 5Gy	7.057	10.76	-3.699	1.976
2.86	3.79	23.81	60.92		0.62	2.18	10.86	52.17		4.33	0.04	3.94	36.71		0Gy vs. 15Gy	7.057	16.6	-9.539	1.956
13.64	6.33	45.54	66.86		2.12	53.79	15.94	37.37		2.17	7.41	8.74	22.59		0Gy vs. 30Gy	7.057	25.48	-18.42	1.956
1.01	4.52	4.05	84.54		3.57	24.67	34.19	10.8		11.54	2.69	9.18	16.91
7.26	5.53	16.29	65.28		3.87	23.57	16.57	16.7		4.51	3	2.94	22.75		Day-11
1.25	0.01	5.31	64.13		23.47	14.02	14.31	13.91		1.17	3.4	2.75	2.61
4.74	55.9	1.9	75.7		17.02	17.46	3.74	0.61		13.77	1.89	37.33	6.29		Tukey's multiple comparisons test	Mean Diff.	95.00% CI of diff.	Significant?	Summary	Adjusted P Value
20.3	0	15.93	81.84		1.8	24.56	10.37	19.26		10.6	2.47	64.26	29.77		0Gy vs. 5 Gy	-1.542	-5.216 to 2.133	No	ns	0.7006
0	9.78	31.38	75.96		9.99	15.64	0.4	33.64		4.63	4.82	3.93	2.21		0Gy vs. 15 Gy	-2.944	-6.654 to 0.7665	No	ns	0.1727
1.44	31.04	67.03	70.8		3.55	15.08	8.45	1.98		6.52	2.98	9.04	3.29		0Gy vs. 30 Gy	-10.48	-14.19 to -6.768	Yes	****	<0.0001
6.63	8.03	42.08	71.29		1.28	9.27	35.08	15.67		4.25	0.92	4.96	6.22		5 Gy vs. 15 Gy	-1.402	-5.077 to 2.273	No	ns	0.7585
1.9	10.9	48.21	31.84		10.68	41.94	0.18	32.42		7.85	6.03	8.26	20.15		5 Gy vs. 30 Gy	-8.936	-12.61 to -5.261	Yes	****	<0.0001
12.92	15.71	48.96	55.94		12.03	15.99	1.56	3.16		4.85	10.25	9.82	4.41		15 Gy vs. 30 Gy	-7.534	-11.24 to -3.824	Yes	****	<0.0001
5.61	12.94	5.2	71.45		7.93	5.55	4.76	30.97		0.85	6.36	13.28	4.65
0.27	30.42	52.25	87.94		6.41	5.81	3.6	19.17		5.24	5.29	0.26	2.95		Test details	Mean 1	Mean 2	Mean Diff.	SE of diff.
2.5	14.91	56.76	84.64		12.74	42.84	16.9	29.53		10.69	12.77	14.97	16.99		0Gy vs. 5 Gy	6.949	8.49	-1.542	1.424
7.98	12.23	57.04	52.93		8.84	21.67	18.26	18.54		3.17	3.29	12.66	12.1		0Gy vs. 15 Gy	6.949	9.893	-2.944	1.438
3.98	3.54	1.86	81.68		6.98	1.77	9.34	19.76		1.19	4.08	25.36	26.43		0Gy vs. 30 Gy	6.949	17.43	-10.48	1.438
4.99	10.33	4.91	42.43		2.31	49.32	6.6	30.84		3.49	8.69	3.02	34.83		5 Gy vs. 15 Gy	8.49	9.893	-1.402	1.424
4.53	3.85	46.19	68.48		0	15.52	0	4.59		11.74	41.48	9.56	13.8
0.55	13.52	0	73.73		0	2.06	22.55	16.37		1.99	5.28	4.88	4.59
47.01	37.54	59.24	82.69		1.85	17.44	4.28	11.5		1.19	17.93	13.7	39.47
10.64	17.65	7.29	66.64		22.29	3.1	28.65	41.75		2.99	4.94	17.75	5.85
14.54	0	71.91	65.01		0	11.39	42.56	30.51		1.43	12.55	17.93	47.1
12.23	7.99	71.31	73.12		3.62	5.49	61.31	59.34		1.06	4.49	13.32	13.73
1.02	47.41	10.89	59.86		0.37	11.86	6.02	4.51		4.43	4.1	1.75	7.81
3.57	89	37.18	64.32		2.22	19.57	10.75	36.73		3.3	3.93	3.05	22.5
8.61	2.07	23.3	75.52		0.71	18.37	8.79	67.74		2.35	3.66	5.24	17.24
1.81	11.23	46.62	55.69		6.18	1.39	16.49	0.5		2.54	11.81	15.11	7.67
1.96	0.86	68.18	76.01		8.15	2.26	33.98	19.78		10.83	34.45	3.88	23.42
4.78	46.36	25.43	66.38		0	2.83	1.54	14.43		1.81	3.48	0.25	8.1
8.97	50.96	5.52	55.28		1.44	19.84	31.1	42.58		8.51	26.49	8.87	13.34
4.28	28.74	24.44	82.33		0.97	3.57	12.5	0.46		13.47	18.65	5.39	12.79
3.8	42.38	0.03	18.57		1.15	6.09	5.89	9.37		26.79	33.45	3.45	8.22
0.66	15.01	16.67	87.41		61.2	5.9	28	10.43		9.06	3.81	4	15.81
3.1	33.97	12.02	75.93		22.52	12.56	19.52	20.57		1.96	2.41	15.71	17.5
0.82	12.73	31.46	67.9		1.08	5.26	15.04	15.26		3.5	3.49	0.84	34.17
2.13	12.4	53.17	79.38		10.26	0.94	32.84	12.17		6.21	0.66	11.72	15.8
19.35	24.28	35.74	77.44		9.17	11.32	15.83	18.24		11.75	1.36	7.13	28.74
2.62	1.63	39.02	65.59		1.71	8.68	12.31	28.87		0.73	0.87	6.24	3.28
2.47	2.24	38.25	70.62		0.93	2.98	12.07	2.43		2.63	1.12	2.54	7.11
1.89	21.24	16.84	73.13		2.25	9.19	12.36	12.04		1.77	4.7	6.05	8.18
3.77	0.41	32.93	78.07		1.03	12.06	37.45	46.47		13.08	0.66	7.71	20.74
3.43	7.84	33.26	67.11		48.05	4.87	52.11	66.07		2.14	0.6	11.49	24.86
3.38	26.54	4.43	73.99		2.09	5.37	39.26	47.18		12.39	1.39	8.28	9.85
3.87	4.69	42.53	76.67		2.4	13.3	26.21	13.85		0.71	0.46	7.78	16.02
0	50.01	47.11	78.86		10.31	2.2	10.04	35.63		4.56	0.69	31.48	9.01
21.4	2.84	31	84.17		2.28	22.99	3.61	14.14		1.03	37.8	2.43	13.63
27.08	9.17	14.45	79.38		0.02	13.07	8.05	30.2		1.53	53.25	38.57	16.98
5.94	6.18	33.59	70.26		0.74	5.6	2.04	30.53		2.3	0	9.53	27.44
0.1	4.49	9.1	79.16		2.46	4.34	6.27	11		2.16	10.33	3.54	10.6
6.92	57.91	7.32	80.72		2.8	1.55	30.23	68.1		0.84	2.7	14.35	14.67
2.96	22.79	45.22	38.49		52.27	7.19	15.01	10.52		15.73	5.49	27.17	4.74
17	9.48	34.16	75.15		6.84	5.24	80.5	28.95		0	2.62	17.33	46.66
15.48	59.48	5.97	50.21		0.87	6.03	27	42.71		9.87	19.53	27.55	35.78
0	30.78	41.62	69.19		1.33	1.48	38.78	10.69		3.49	8.35	16.42	18.18
2.94	64.99	50.63	81.28		1.48	1.2	23.94	11.22		4.93	1.8	3	14.8
3.96	56.88	3.06	67.09		9.88	1.7	47.94	30.56		3.67	32.87	1.78	52.62
1.96	80.5	2.3	74.76		3.73	0.96	44.7	10.58		0	11.17	6.62	52.09
3.67	44.63	7.09	71.03		7.46	6.24	29.33	51.27		15.75	12.14	1.52	5.21
0.71	69.2	5.45	61.54		2.3	4.04	6.06	40.07		16.47	6.02	15.7	36.63
13.36	7.99	29.32	87.59		10.8	5.65	2.8	22.65		6.38	5.3	12.5	52.08
12.44	33.32	15.28	33.02		13.23	10.95	17.03	1.63		8.29	1.17	7.33	25.34
6.17	1.41	3.76	59.88		17.19	20.1	9.27	42.22		2.96	1.54	10.81	33.41
13.41	1.5	36.29	76.66		2.64	2.56	19.44	61.36		2.65	10.99	2.85	2.53
5.23	19.93	41.71	70.45		1.97	9.21	4.85	11.1		32.18	10.22	8.58	22.66
1.91	0.55	77.41	71.31		0	8.09	8.77	6.56		6.28	0.37	2.42	7.56
1.81	11.08	31.58	59.92		4.93	1.9	3.78	21.58		18.62	13.28	8.67	9.38
0	35.83	14.09	64.43		2.3	7.08	21.79	17.46		1.09	16.33	44.76	44.65
0.38	14.17	49.59	38.89		5.3	5.85	15.82	33.85		1.47	13.14	6.94	1.71
1.06	38.58	27.53	51.63		9.97	5.66	30.23	19.8		20.91	2.43	18.41	14.28
3.66	45.23	41.21	66.43		48.4	3.92	8.28	12.67		2.44	4.47	13.3	11.64
3.7	63.57	43.35	71.63		1.88	4.62	5.6	19.57		35.36	2.01	8.38	12.96
9.61	76.22	41.52	84.59		5.13	4.72	6.78	14.03		0	6.74	4.3	9.52
12.21	6.75	62.34	68.3		18.16	4.39	8.17	2.04		12.93	8.64	3.53	2.57
2.54	7.56	23.54	78.21		3.15	4.19	17.23	26.29		2.49	10.23	1.65	4.63
2.04	19.01	3.9	50.77		1.23	5.15	12.07	30.36		5.21	6.09	2.63	5.49
0.55	8.28	43.15	29.61		2.14	3.63	12.6	46.63		7.01	12.85	8.94	48.06
3.02	8.57	31.14	76.28		1.02		48.99	45.26		1.74	3.7	3.17	13.33
9.41	4.5	45.68	52		1.19		4.53	11.7		8.72	9.92	14.1	11.75
2.47	2.55	80.18	60.06		1.1		3.67	44.85		7.66	6.78	13.57	0.83
1.01	15.81	66.73	77.35		2.69		5.32	25.18		2.88	23.85	12.34	12.78
											8.84
											8.95
											5.72
											1.99
