# Supplementary material for: Ongoing repair of migration-coupled DNA damage allows planarian adult stem cells to reach wound sites
Source: eLife journal article supplement (doi:10.7554/elife.63779), 2021-04-23
Supplement: fig1-figsupp2-data1 [file Fig1_source data_8_panel E.xlsx]

## Sheet: Panel D
PAR fluorescence in individual cells at different time points post IR
Tudor 1 + Stem cells
0Gy	5 mins	15 mins	1 hour	6 hour	24 hour
3.41912	11.8668	9.01752	2.8574	5.54206	1.71324		One way ANOVA
2.26098	17.9332	19.4288	3.2901	8.11535	2.33274		Tukey's multiple comparisons test	Mean Diff.	95.00% CI of diff.	Significant?	Summary	Adjusted P Value
3.71628	8.1082	21.7994	3.781	3.93406	2.13027		0Gy vs. 5 mins	-18.92	-21.64 to -16.21	Yes	****	<0.0001
3.72214	9.40209	11.4206	5.70465	11.2009	3.07802		0Gy vs. 15 mins	-8.598	-11.29 to -5.902	Yes	****	<0.0001
2.11082	17.2766	19.7909	4.6865	3.52148	2.43386		0Gy vs. 1 hour	-9.8	-12.52 to -7.083	Yes	****	<0.0001
3.72477	23.9286	10.0417	17.586	13.0719	2.56082		0Gy vs. 6 hour	-4.964	-7.869 to -2.058	Yes	****	<0.0001
6.6021	9.56442	8.46689	11.0771	8.10856	1.70733		0Gy vs. 24 hour	-0.3333	-3.011 to 2.344	No	ns	0.9992
5.31893	9.50075	20.8179	26.9425	6.97584	1.76175		5 mins vs. 15 mins	10.32	7.481 to 13.17	Yes	****	<0.0001
3.51095	13.4373	8.81076	7.23685	3.62693	2.12884		5 mins vs. 1 hour	9.123	6.261 to 11.98	Yes	****	<0.0001
4.17071	11.9821	6.49709	9.88982	15.0313	1.77853		5 mins vs. 6 hour	13.96	10.92 to 17.00	Yes	****	<0.0001
4.65542	15.4102	13.4229	12.2416	7.63027	5.89116		5 mins vs. 24 hour	18.59	15.76 to 21.41	Yes	****	<0.0001
10.6204	20.2701	15.0325	7.75432	3.33959	3.93483		15 mins vs. 1 hour	-1.201	-4.044 to 1.642	No	ns	0.8322
3.80786	21.5794	15.5023	12.0687	16.4132	4.08481		15 mins vs. 6 hour	3.635	0.6113 to 6.658	Yes	**	0.0083
2.29756	13.0508	6.55687	8.56144	11.0152	6.35876		15 mins vs. 24 hour	8.265	5.460 to 11.07	Yes	****	<0.0001
3.58885	25.0776	6.22499	10.6132	2.76148	3.2541		1 hour vs. 6 hour	4.836	1.795 to 7.878	Yes	***	0.0001
5.43218	8.13657	11.2179	10.5195	4.00002	6.35897		1 hour vs. 24 hour	9.466	6.642 to 12.29	Yes	****	<0.0001
4.20368	23.6132	9.0583	26.2988	5.94531	3.26055		6 hour vs. 24 hour	4.63	1.624 to 7.637	Yes	***	0.0002
4.88096	19.1577	7.59043	10.7589	4.91989	7.70803
3.19847	22.475	9.034	16.4254	9.32365	4.91747
4.99738	14.7813	12.6879	7.7192	7.52502	4.41775
2.5848	23.912	8.80806	14.1727	9.71353	5.46622
2.85699	16.782	23.5682	8.31332	7.48487	6.3305
1.73792	13.5689	10.0212	6.83232	5.48953	3.09097
1.71877	13.6635	7.33544	12.2227	5.10233	6.18238
1.68954	10.2042	3.03243	13.4991	5.90318	1.21093
2.30532	8.16398	14.8011	12.2656	4.73705	4.70774
1.6099	15.9335	4.32817	10.1972	4.32242	2.13091
1.86045	39.1932	9.37018	10.5801	3.03859	2.46582
1.71132	29.4644	7.00759	7.88586	8.73133	3.09506
3.23893	9.14792	6.08747	8.87311	4.501	4.03335
2.57224	34.1932	11.5136	17.6018	3.8362	4.59785
0.998289	18.3423	21.8939	11.9612	5.92687	7.38577
1.97081	16.7011	6.27844	11.0519	5.07216	6.32582
1.54655	37.7509	5.62232	11.0281	10.3997	4.53796
1.02674	17.4929	20.5061	6.22339	10.6041	4.23795
1.55215	43.6682	6.69863	9.49886	8.63373	2.99582
2.56783	27.2814	2.9746	19.6016	8.10099	4.34132
2.21314	48.892	7.43342	24.8732	8.89546	1.89941
2.43311	31.3633	3.75871	10.9762	7.39958	2.73988
2.52641	24.0943	14.189	13.5312	5.1414	1.65318
1.6163	47.007	11.9061	10.652	11.4605	2.82335
2.22362	28.4971	5.87668	12.9451	13.0165	3.20458
1.37272	13.2991	12.4344	12.5577	10.5691	1.88701
1.59914	42.5461	7.50709	15.2227	16.378	1.66561
1.90191	45.4624	14.3971	6.66198	9.04309	2.27381
1.75252	16.2406	10.4623	9.23391	8.07635	3.28837
1.71921	16.4377	17.3383	12.0017	15.0241	3.28837
1.49025	16.0697	6.65679	14.2447	17.0439	3.42418
2.1454	53.0839	17.026	15.8687	7.3171	2.25235
1.73135	41.2886	3.76926	22.8461	15.6631	2.46125
1.84994	26.1187	5.20107	19.6851	4.98257	2.60501
2.41784	23.7457	9.15588	10.8175	4.78081	2.2008
2.23394	44.9639	12.7501	14.7588	18.0382	2.3713
3.86969	20.8858	8.81578	25.2783	14.1646	1.97455
5.73202	16.5809	6.39514	21.3449	9.4162	2.47902
6.83531	21.4613	4.77666	20.9193	12.8364	1.84012
4.40525	22.7517	21.9314	24.7648	15.8666	4.76083
5.54629	31.2482	16.846	16.3777	12.4307	2.75761
6.26166	6.67412	10.9805	16.2828		3.4859
6.51387	31.6131	14.3996	17.5583		6.39116
8.35334	43.4038	17.2523	22.3416		5.63414
5.73753	19.7132	22.9815	16.393		6.3894
5.57304	14.8513	22.6985	14.582		3.78412
4.39447	20.8011	15.3829	15.6666		3.88265
3.92396	34.0973	7.94283	8.09981		4.62563
4.14116	16.7016	10.3215	22.9982		8.08736
3.1883	16.8155	7.65063	16.4751		5.76401
3.31516	15.3221	14.9656	17.789		9.08496
3.68684	21.5076	5.64552	16.9785		8.56021
4.03803	21.9893	17.355	15.1006		6.97618
3.14582	20.3578	31.5475	14.1212		3.82594
3.64223	24.2845	20.8225	13.5578		2.65056
4.21638	17.5672	26.5599	12.4544		5.09968
3.24873		25.7646			4.77454
2.66996		17.4684			6.71481
2.70611					9.50348
4.72476					4.74443
4.14052
2.6843
4.56372
3.61605
6.49226
5.43463
7.30543
5.04808
3.55042
6.12363
6.60458
5.99119
6.15113
5.99875
