# Supplementary material for: Ongoing repair of migration-coupled DNA damage allows planarian adult stem cells to reach wound sites
Source: eLife journal article supplement (doi:10.7554/elife.63779), 2021-04-23
Supplement: fig1-figsupp2-data1 [file Fig1_source data_9_panel F.xlsx]

## Sheet: Panel F
panel F
Tudor 1 - Stem cells
0Gy	5 mins	15 mins	1 hour	6 hour	24 hour
4.45903	24.937	13.9624	3.07726	5.33097	2.61404
6.5573	14.2947	10.447	9.19901	15.1416	4.22592		Tukey's multiple comparisons test	Mean Diff.	95.00% CI of diff.	Significant?	Summary	Adjusted P Value
1.87409	9.37118	51.3414	3.16992	4.08937	3.47883		0Gy vs. 5 mins	-24.74	-27.69 to -21.79	Yes	****	<0.0001
8.47934	13.7606	28.7058	5.27506	5.25621	1.18834		0Gy vs. 15 mins	-10.96	-13.67 to -8.249	Yes	****	<0.0001
3.60332	28.674	19.9911	6.08308	14.1615	3.20312		0Gy vs. 1 hour	-6.438	-9.830 to -3.046	Yes	****	<0.0001
8.16127	19.4903	14.3962	12.5641	12.255	4.85011		0Gy vs. 6 hour	-5.093	-8.466 to -1.719	Yes	***	0.0003
4.70597	13.0564	8.50665	16.1888	3.43025	4.53808		0Gy vs. 24 hour	0.1532	-2.547 to 2.853	No	ns	>0.9999
6.35246	26.7606	35.4962	5.96773	16.5844	5.13612		5 mins vs. 15 mins	13.78	10.92 to 16.64	Yes	****	<0.0001
5.62765	36.4256	20.8675	10.8468	9.77615	5.19917		5 mins vs. 1 hour	18.3	14.79 to 21.81	Yes	****	<0.0001
9.14147	48.1409	30.5817	9.36114	5.27266	3.44508		5 mins vs. 6 hour	19.65	16.15 to 23.14	Yes	****	<0.0001
3.01622	23.945	15.0481	17.0478	8.39506	2.66744		5 mins vs. 24 hour	24.89	22.04 to 27.74	Yes	****	<0.0001
3.58712	29.6125	27.9509	10.7318	14.7067	2.92198		15 mins vs. 1 hour	4.521	1.204 to 7.837	Yes	**	0.0015
3.0223	22.7061	12.6258	4.54302	7.7669	3.86464		15 mins vs. 6 hour	5.866	2.569 to 9.163	Yes	****	<0.0001
3.3466	27.2728	16.9842	6.45117	6.56804	4.38748		15 mins vs. 24 hour	11.11	8.508 to 13.72	Yes	****	<0.0001
3.31852	10.587	13.0551	7.91318	4.71601	4.12733		1 hour vs. 6 hour	1.345	-2.533 to 5.223	No	ns	0.9205
2.20459	22.1146	14.1196	5.20072	11.2061	5.88884		1 hour vs. 24 hour	6.591	3.283 to 9.900	Yes	****	<0.0001
2.47258	68.1137	18.63	16.4515	7.97793	3.85932		6 hour vs. 24 hour	5.246	1.957 to 8.536	Yes	****	<0.0001
3.75886	25.8904	32.4894	13.5149	4.36207	4.43743
1.9591	25.7957	10.6628	6.13677	6.48412	4.59769
7.54362	32.7243	16.7967	13.966	6.7382	7.12843
8.97936	16.3361	27.0464	20.8363	3.46364	5.89499
5.52188	15.6254	12.6689	29.4878	8.19508	3.08962
3.06826	46.5869	12.336	13.8516	4.95479	4.49366
4.89403	34.7347	15.8741	8.9736	4.5478	2.36272
2.735	49.4057	16.2331	12.1451	5.07216	3.75168
1.4814	53.1132	9.98143	16.7202	7.69212	2.56596
0.734356	23.0881	23.2539	6.95035	8.30073	2.45413
2.80505	15.0743	21.3472	10.989	9.60744	3.28023
3.60641	24.1243	36.9169	10.8318	7.08819	5.06918
2.68545	51.7312	7.84758	11.4872	6.0495	5.34682
4.02228	64.903	9.85546	12.0819	5.48997	2.48451
1.47949	37.3856	18.74	24.767	8.37973	2.27454
2.44394	17.7094	18.2152	12.145	12.7646	3.91525
1.27514	13.9713	12.0905	17.2092	7.53968	3.41274
1.31651	22.297	8.78392	6.61557	15.2619	4.32461
2.01187	20.6042	7.6842	24.5031	13.789	6.7644
2.02437	28.9152	28.6507	7.26039	11.9434	3.90081
1.38155	18.2523	16.0762	16.6811	8.80285	1.93084
1.64196	22.7412	9.81933	8.70684	12.3603	2.42433
1.08752	26.0371	17.7141	12.3046	8.10317	1.9921
0.922936	18.0202	4.49898	10.3763	8.70114	3.25675
1.64843	24.0442	8.29204	12.1423	16.099	3.45061
1.50492	28.7333	8.94355	16.4544	14.1547	3.57472
1.94588	53.4428	3.91144	4.86271	14.3518	3.22159
1.11653	46.6389	10.9803	5.74613	5.00594	2.67127
1.84498	38.4012	12.1245	9.45301	7.53522	2.16429
0.873999	57.6613	10.3941	18.339	13.3988	1.54383
1.12297	51.3309	3.59505	3.95627	9.2005	3.26151
1.8411	24.2684	6.47863	19.0514	13.2488	2.81106
1.94045	31.0418	13.398	12.6748	12.7085	3.3009
3.08153	29.5317	4.75917	12.8735	8.17656	2.6909
1.69632	28.1847	3.57093	9.04173	6.358	2.6746
2.08865	47.5697	23.1249	9.61931	9.51839	3.56187
2.47749	18.8008	9.06875	8.2442	21.1007	4.94396
1.37827	25.5327	6.23887	7.24933	9.36814	4.30558
3.67189	15.5044	6.36567	6.13364	13.0499	3.34498
8.17847	48.4537	5.48391	4.00721	18.4117	2.8126
8.33913	48.6628	4.50565	5.64905	11.4538	4.13963
5.77835	54.6317	6.01954	4.2736	17.2582	3.29137
4.68894	51.6034	3.68567		9.93838	2.65429
7.50044	35.1128	22.9608			2.69213
5.67219	57.471	16.5687			4.05024
7.09842	19.0777	25.6909			2.73115
10.0378	10.2052	25.9174			4.23382
13.7671	43.1851	23.7614			2.91114
5.64157	8.30986	22.066			2.31059
3.23018	18.8447	24.287			2.29793
6.76195	31.918	33.8928			3.81822
3.70827	39.5147	7.30703			2.15827
5.62927	38.0891	24.9425			1.66393
4.78487	45.8973	16.2196			3.97519
4.5346	30.8255	17.7259			3.68424
4.20833	17.1553	13.1826			2.55906
5.86534	25.9975	16.5842			2.38697
4.53411	31.9362	8.33432			1.48736
4.9945	28.846	20.9939			1.78168
4.31533	32.0123	20.3544			2.56048
3.43011	19.4566	9.43845			2.91754
3.76793	12.7294	28.1364			3.37928
6.36091	20.5833	9.59988			2.69178
4.34922	11.6341	10.055			2.34322
3.84052	15.4512	12.8598			1.21038
8.74146	26.1083	8.72283			3.14882
2.96852	40.1721	10.3545			2.52261
3.236	19.3861	7.25365			3.6052
3.86792	25.2412	6.13472			2.82247
5.27566	19.3497	11.0161			4.11972
4.67872	40.224	1.63163			2.90955
3.26259	21.9269	9.69908			4.57594
3.94507	23.2203	13.5993			1.79305
9.01568	17.7797	16.9277			5.75282
4.59475	21.5444	12.2081			4.66849
4.68257	17.9981	11.2252			5.54692
3.75915	17.719	9.05816			14.4851
8.92771		13.3099			6.9921
4.53967		2.89767			4.55218
6.68957		12.6438			5.06842
9.50054		13.2529			8.19069
2.33785		10.7728			5.91344
7.26096		8.69623			11.8572
6.80058		26.5798			14.5162
3.63018		25.1154			8.96564
3.11117		3.13931			10.5549
5.24695		4.85065			8.4414
7.68656		12.323			12.6493
4.44271		21.3238			7.7833
5.30562		17.974			7.84442
9.03103		30.9			8.10931
8.32331		19.7453			6.62542
9.24614		16.318			6.0305
6.51221		21.1213			4.07165
7.90441		26.6006			8.38741
8.22123		21.6115			7.73789
7.57467		32.5349			4.94621
		8.70886			12.2799
		12.6182			3.86819
		9.05736			3.65136
		6.77916			3.29961
		20.4413			4.08403
		15.7124			3.55791
		18.822			5.13398
		12.8197			3.66108
		14.6504			5.6556
		23.0576			6.05697
		37.0455			4.09654
		23.7689			3.11993
		17.5249			4.13415
		11.8537			4.49725
		10.5376			2.56191
		10.7117			3.53789
		8.07426			5.49486
					6.66627
					7.42557
