# Supplementary material for: Ongoing repair of migration-coupled DNA damage allows planarian adult stem cells to reach wound sites
Source: eLife journal article supplement (doi:10.7554/elife.63779), 2021-04-23
Supplement: fig1-figsupp3-data1 [file Fig1_sourcedata_10_Panel B_and_D.xlsx]

## Sheet: Panel B_D
Histone 3 PSer10 data
n=5 worms per condition
H3P+ cells/mm2	Unirradiated (Panel-B)
Control (RNAi)	atr (RNAi)	brca2 (RNAi)				One way ANOVA
111.66	186.714	163.053				Tukey's multiple comparisons test	Mean Diff.	95.00% CI of diff.	Significant?	Summary	Adjusted P Value
143.499	166.745	110.517				Control (RNAi) vs. atr (RNAi)	-17.7	-69.56 to 34.16	No	ns	0.6442
140.582	175.775	100.576				Control (RNAi) vs. brca2 (RNAi)	10.61	-41.25 to 62.47	No	ns	0.8506
196.507	116.462	126.294
139.257	174.3	178.029
Panel-D
n=5 worms per condition
10 day post 15 Gy IR
Control (RNAi)	atr (RNAi)	brca2 (RNAi)				Tukey's multiple comparisons test	Mean Diff.	95.00% CI of diff.	Significant?	Summary	Adjusted P Value
91.0339	62.0233	3.21				Control (RNAi) vs. atr (RNAi)	74.91	38.30 to 111.5	Yes	***	0.0004
122.586	24.6679	1.21				Control (RNAi) vs. brca2 (RNAi)	102.5	65.92 to 139.1	Yes	****	<0.0001
145.587	12.567	0
92.9085	33.12	0
64.939	10.145	0
