# Supplementary material for: Ongoing repair of migration-coupled DNA damage allows planarian adult stem cells to reach wound sites
Source: eLife journal article supplement (doi:10.7554/elife.63779), 2021-04-23
Supplement: fig1-figsupp3-data1 [file Fig1_sourcedata_11_panel F_and_H.xlsx]

## Sheet: Panel F and H
Knockdown of PARPS and its effect on Proliferation
							One way ANOVA
n=5 worms per condition							Tukey's multiple comparisons test	Mean Diff.	95.00% CI of diff.	Significant?	Summary	Adjusted P Value
Unirradiated (Panel F)							Control (RNAi) vs. parp1 (RNAi)	44.15	-18.93 to 107.2	No	ns	0.2279
Control (RNAi)	parp1 (RNAi)	parp2 (RNAi)	parp3 (RNAi)				Control (RNAi) vs. parp2 (RNAi)	19.74	-43.34 to 82.81	No	ns	0.8074
256.766	161.271	167.297	141.209				Control (RNAi) vs. parp3 (RNAi)	31.52	-31.56 to 94.59	No	ns	0.5001
172.783	172.839	256.816	193.638
202.15	220.543	189.179	208.191
258.811	189.175	242.179	195.696
226.817	152.758	163.176	221.001
n=5 worms per condition
10 day post 15 Gy IR (Panel H)
Control (RNAi)	parp1 (RNAi)	parp2 (RNAi)	parp3 (RNAi)				Tukey's multiple comparisons test	Mean Diff.	95.00% CI of diff.	Significant?	Summary	Adjusted P Value
91.0339	78.34	31.0264	15.379				Control (RNAi) vs. parp1 (RNAi)	58.89	19.11 to 98.67	Yes	**	0.0032
122.586	28.6996	39.9603	31.9499				Control (RNAi) vs. parp2 (RNAi)	56.65	16.87 to 96.43	Yes	**	0.0044
145.587	41.874	66.9015	27.3456				Control (RNAi) vs. parp3 (RNAi)	71.44	31.66 to 111.2	Yes	***	0.0005
92.9085	21.34	44.5506	59.8517
64.939	52.34	51.37	25.34
