# Supplementary material for: Ongoing repair of migration-coupled DNA damage allows planarian adult stem cells to reach wound sites
Source: eLife journal article supplement (doi:10.7554/elife.63779), 2021-04-23
Supplement: fig1-figsupp3-data1 [file Fig1_sourcedata_12_panel_J.xlsx]

## Sheet: Panel J
Control	atr	atm	brca2	Rad51	FancJ	parp1	parp2	parp3
2630.81	2244.11	2089.37	2138.5	226.572	2508.94	2474.61	2320.03	2527.37
2044.39	2095.7	2020.48	1839.07	244.64	1939.49	2350.14	2445.25	2501.25
2473.03	2497.05	2113.38	2171.82	104.138	2578.42	2140.76	2364.13	1967.49
2375.08	2082.03	1945.9	2064.53	248.056		2289.5	2033.79	2208.47
2028.66	2151.15	1913.76	1835.78	272.975		2019.54	2301.79
Tukey's multiple comparisons test	Mean Diff.	95.00% CI of diff.		Summary	Adjusted P Value
Control vs. atr	96.38	-308.9 to 501.7		ns	0.9965
Control vs. atm	293.8	-111.5 to 699.1		ns	0.3154
Control vs. brca2	300.5	-104.9 to 705.8		ns	0.2884
Control vs. Rad51	2091	1686 to 2496		****	<0.0001
Control vs. FancJ	-31.89	-499.9 to 436.1		ns	>0.9999
Control vs. parp1	55.48	-349.8 to 460.8		ns	>0.9999
Control vs. parp2	17.39	-387.9 to 422.7		ns	>0.9999
Control vs. parp3	9.246	-420.7 to 439.2		ns	>0.9999
