# Supplementary material for: Ongoing repair of migration-coupled DNA damage allows planarian adult stem cells to reach wound sites
Source: eLife journal article supplement (doi:10.7554/elife.63779), 2021-04-23
Supplement: fig1-figsupp3-data1 [file Fig1_sourcedata_13_panel K.xlsx]

## Sheet: Panel K
Worm survival after knockdown of DDR genes at homeostatic condition
Homeostatic condition
Days	Control	atr	atm	brca2	rad51	fancj	parp1	parp2	parp3
1	10	10	10	10	10	10	10	10	10
3	10	10	10	10	10	10	10	10	10
5	10	10	10	10	10	10	10	10	10
7	10	10	10	10	8	10	10	10	10
10	10	10	10	10	6	10	10	10	10
15	10	10	10	10	4	10	10	10	10
17	10	10	10	10	0	10	10	10	10
21	10	10	10	10	0	10	10	10	10
24	10	10	10	10	0	10	10	10	10
27	10	10	10	10	0	10	10	10	10
Percentage
Days	Control	atr	atm	brca2	rad51	fancj	parp1	parp2	parp3
1	100	100	100	100	100	100	100	100	100
3	100	100	100	100	100	100	100	100	100
5	100	100	100	100	100	100	100	100	100
7	100	100	100	100	80	100	100	100	100
10	100	100	100	100	60	100	100	100	100
15	100	100	100	100	40	100	100	100	100
17	100	100	100	100	0	100	100	100	100
21	100	100	100	100	0	100	100	100	100
24	100	100	100	100	0	100	100	100	100
27	100	100	100	100	0	100	100	100	100
