# Supplementary material for: Ongoing repair of migration-coupled DNA damage allows planarian adult stem cells to reach wound sites
Source: eLife journal article supplement (doi:10.7554/elife.63779), 2021-04-23
Supplement: fig1-figsupp3-data1 [file Fig1_sourcedata_14_Panel L.xlsx]

## Sheet: Panel L
Worm survival after knockdon of HR components and exposed to 15 Gy IR
Homologous Recombination (HR) -15 Gy Irradiation					n=20			Percentage for survival curve
Days	Control	brca2	atr	rad51	fancJ	atm		Days	Control	brca2	atr	rad51	fancJ	atm
1	20	20	20	20	20	20		1	100	100	100	100	100	100
3	20	20	20	20	20	20		3	100	100	100	100	100	100
5	20	20	20	14	20	20		5	100	100	100	70	100	100
7	20	20	20	10	20	20		7	100	100	100	50	100	100
10	20	20	20	6	20	20		10	100	100	100	30	100	100
12	20	20	20	6	20	19		12	100	100	100	30	100	95
14	20	20	20	0	17	19		14	100	100	100	0	85	95
16	20	20	20	0	14	17		16	100	100	100	0	70	85
18	20	20	20	0	10	15		18	100	100	100	0	50	75
20	20	16	18	0	10	15		20	100	80	90	0	50	75
22	20	15	14	0	8	10		22	100	75	70	0	40	50
24	20	13	14	0	8	10		24	100	65	70	0	40	50
26	20	5	10	0	4	8		26	100	25	50	0	20	40
28	20	0	4	0	4	6		28	100	0	20	0	20	30
30	20	0	0	0	0	2		30	100	0	0	0	0	10
34	20	0	0	0	0	2		34	100	0	0	0	0	10
37	20	0	0	0	0	0		37	100	0	0	0	0	0
