# Supplementary material for: Ongoing repair of migration-coupled DNA damage allows planarian adult stem cells to reach wound sites
Source: eLife journal article supplement (doi:10.7554/elife.63779), 2021-04-23
Supplement: fig1-figsupp3-data1 [file Fig1_sourcedata_15_Panel M.xlsx]

## Sheet: Panel M
Worm survival after knockdown of Alt-NHEJ components and exposed to 15 Gy IR
PARP in survival after 15 Gy IR								Percentage for graphs.
Days	Control	parp-1	parp-2	parp-3				Days	Control	parp-1	parp-2	parp-3
1	20	20	20	20				1	100	100	100	100
3	20	20	20	20				3	100	100	100	100
5	20	20	20	20				5	100	100	100	100
7	20	20	20	20				7	100	100	100	100
10	20	20	20	20				10	100	100	100	100
12	20	20	18	20				12	100	100	90	100
14	20	20	14	16				14	100	100	70	80
16	20	20	14	12				16	100	100	70	60
18	20	20	12	8				18	100	100	60	40
20	20	17	10	4				20	100	85	50	20
22	20	12	10	4				22	100	60	50	20
24	20	8	8	2				24	100	40	40	10
26	20	7	4	2				26	100	35	20	10
28	20	4	2	0				28	100	20	10	0
30	20	2	2	0				30	100	10	10	0
35	20	2	0	0				35	100	10	0	0
37	20	0	0	0				37	100	0	0	0
