# Supplementary material for: Ongoing repair of migration-coupled DNA damage allows planarian adult stem cells to reach wound sites
Source: eLife journal article supplement (doi:10.7554/elife.63779), 2021-04-23
Supplement: fig1-figsupp3-data1 [file Fig1_sourcedata_16_panel N.xlsx]

## Sheet: Panel N
	Replicate-1			Replicate-2
Control	1.03	0.99	0.98	0.99	0.95	1.05
atr	0.29	0.45	0.38	0.19	0.24	0.27
atm	0.38	0.34	0.27	0.42	0.46	0.43
brca2	0.2	0.19	0.13	0.24	0.21	0.32
rad51	0.1	0.13	0.08	0.12	0.12	0.15
fancJ	0.32	0.28	0.28	0.36	0.28	0.3
parp-1	0.18	0.17	0.25	0.36	0.31	0.29
parp-2	0.41	0.32	0.38	0.27	0.36	0.35
parp-3	0.16	0.24	0.18	0.3	0.23	0.36
