# Supplementary material for: Ongoing repair of migration-coupled DNA damage allows planarian adult stem cells to reach wound sites
Source: eLife journal article supplement (doi:10.7554/elife.63779), 2021-04-23
Supplement: fig2-data1 [file Fig2_Source data_1_2C.xlsx]

## Sheet: 2C
Nuclear Aspect Ratio between cells in shueld region and migratory
Shield	Migratory		Unpaired t test with Welch's correction
1.18269	1.32708		P value	<0.0001
1.25	2.81881		P value summary	****
1.28773	1.64773		Significantly different (P < 0.05)?	Yes
0.9375	1.70624
1.28889	2.32424
1.23967	2.16667
1.44737	1.57975
1.42857	1.51892
1.01542	1.6383
1.30969	1.55696
1.12	1.46684
1.00407	1.48257
1.18182	1.63922
1.08853	1.67042
1.12796	1.43517
1.12889	1.84211
0.912	1.67123
1.28571	1.58621
1.19914	1.75758
1.2093	2.07143
1.24528	1.38351
1.29252	1.36429
1.24262	1.39423
1.36	1.36885
	1.80253
	1.54113
	1.59744
	1.48536
