# Supplementary material for: Ongoing repair of migration-coupled DNA damage allows planarian adult stem cells to reach wound sites
Source: eLife journal article supplement (doi:10.7554/elife.63779), 2021-04-23
Supplement: fig2-data1 [file Fig2_Source data_2_2E.xlsx]

## Sheet: Fig. 2E
PAR fluorescence in TUD1+ Stem cells from shielded and migratory region.								Migratory TUD1+Stem cells
Fig 2E								Tukey's multiple comparisons test	Mean Diff.	95.00% CI of diff.	Significant?	Summary	Adjusted P Value
Shield 0dpa	Shield 4dpa	Migratory 4dpa	Shield 7dpa	Migratory 7dpa	Shield 10dpa	Migratory 10dpa		Shield 0dpa vs. Shield 4dpa	1.809	-0.3482 to 3.967	No	ns	0.1685
20.2085	3.6273	10.5438	4.75096	25.124				Shield 4dpa vs. Migratory 4dpa	0.5817	-1.687 to 2.850	No	ns	0.9887
15.5342	8.05078	11.6586	5.32924	8.46313	5.6532	5.16326		Shield 7dpa vs. Migratory 7dpa	-8.201	-10.12 to -6.281	Yes	****	<0.0001
9.41856	6.63104	7.49809	8.39292	17.3644	5.97389	3.44214		Shield 10dpa vs. Migratory 10dpa	-0.433	-2.261 to 1.394	No	ns	0.9926
5.53379	11.2428	8.18531	8.05969	16.9068	6.4823	4.43804
4.53728	15.2133	9.58853	11.8608	27.3434	10.7764	5.52973
10.0597	9.5783	19.4918	11.5092	21.4248	7.64018	4.34191
4.67152	15.5311	6.45422	9.87665	16.3532	4.76661	6.88313
3.24233	5.60926	11.6913	17.0555	19.8942	5.61272	6.85829
9.05562	12.7502	22.866	9.52341	13.9597	5.67125	3.56465
5.62465	3.66438	23.3239	7.62516	17.0778	5.39712	3.43127
23.0156	5.4199	6.9429	5.83891	7.6692	4.94179	4.63943
6.98463	8.66876	12.7194	12.8766	24.0812	5.03229	4.22975
28.6169	3.46732	7.88734	12.5994	9.71667	10.5703	4.73722
6.95967	6.29013	4.99452	11.0995	12.7994	6.10688	5.47681
6.25327	5.62109	7.54803	6.58877	12.902	6.05365	6.22076
15.8724	5.26715	9.10979	6.36403	9.6685	6.78885	6.10939
10.1469	6.44477	7.37484	7.56307	11.9676	4.55828	7.74837
6.8405	6.30414	8.03926	12.3255	13.8809	5.34321	4.23989
5.96926	8.067	14.0165	6.98792	24.1347	4.62437	8.56282
10.8066	9.32845	7.04353	9.51096	7.27776	4.71142	6.7578
4.65305	4.26188	13.3041	11.3093	25.0965	8.02391	4.51851
7.00276	7.84365	8.44852	15.2781	17.4646	5.02501	9.47604
8.04795	14.4652	4.64377	6.83946	9.83104	7.30288	7.14267
11.3588	8.42157	5.42391	10.475	36.3042	6.03042	9.62988
4.9933	5.776	4.72543	6.25419	17.8809	8.5021	2.43611
7.22787	13.3433	6.13795	8.63411	15.7893	7.43957	4.38299
8.07205	10.6113	4.75783	5.40189	5.30183	5.2804	6.11451
4.37728	8.17728	5.93019	4.55541	41.8659	6.96357	6.16978
31.614	11.5227	4.23141	7.10288	7.65027	10.361	4.0096
5.46103	6.44391	6.87959	9.13589	6.70459	7.84131	4.09808
6.9885	4.96148	8.51958	5.24683	20.4762	4.6698	4.96091
6.38643	5.61419	7.1794	6.85582	10.3234	5.1632	4.36402
23.5519	5.48601	7.11059	6.78038	8.69216	5.80772	5.40454
7.50505	8.20801	6.39363	6.16708	11.6214	4.14829	4.11344
9.9439	5.10987	5.23208	4.72824	21.3557	6.69438	3.88729
5.66956	5.40069	11.2553	5.70421	17.5315	6.05584	6.78055
7.8197	8.06703	6.7055	4.04255	8.04222	4.76433	5.36248
15.5451	4.58401	7.96117	3.71556	10.6302	7.51623	7.97472
6.1035	4.20937	5.46206	5.67446	9.57537	4.98554	6.44975
5.93151	6.35525	7.06486	4.47579	11.0642	6.56646	7.34365
13.7167	5.25283	6.41067	4.6856	4.47384	4.78271	4.4542
15.6069	4.77587	8.03639	9.31074	4.11589	8.12316	5.84271
5.31799	14.6129	5.64352	6.0602	8.66596	8.84505	5.77586
5.21661	7.56796	5.14865	6.34784	18.0618	7.35187	5.48951
10.535	10.2174	4.97879	6.99102	7.05801	6.49232	2.92109
3.85623	9.33695	6.17285	7.37672	42.3536	6.13247	3.30775
6.45508	11.504	8.45938	9.47002	48.3412	4.57557	4.03121
6.03902	7.37107	12.3877	6.25999	9.1621	7.01482	2.66924
8.31447	11.9191	6.4658	6.64282	1.71493	5.46264	6.88398
15.5129	5.91865	12.8793	5.94267	14.6296	4.81319	4.821
6.15188	11.8507	21.1164	4.69761	13.2006	5.76087	5.41796
8.67328	9.80798	5.93656	6.03835	9.49917	6.21759	10.5353
3.25809	10.728	6.36993	9.49616	18.2352	4.56724	5.88633
3.84867	9.36875	8.0609	6.39107	11.2035	4.61032	4.52892
20.5194	6.77966	9.97457	8.10726	9.17367	5.97854	4.0375
9.91046	15.1107	8.50282	7.46278	12.1283	5.21887	5.25014
23.1203	7.24896	8.33778	6.39605	27.1181	4.90852	4.69207
14	11.0754	9.52389	7.52455	6.34877	5.68138	5.20543
7.93327	16.1439	9.62854	5.02112	12.1045	5.50343	4.73511
8.47646	13.6532	6.43672	3.57534	24.5751	5.47348	6.74479
9.77266	3.93916	5.68107	5.95536	8.09246	5.29319	4.8881
13.1654	4.95469	8.79745	3.93966	15.4737	4.42315	4.3003
12.9865	5.45651	15.51	5.32858	32.7499	4.42559	5.2084
12.5778	7.51822	8.83059	4.00541	19.202	10.5036	5.42003
5.71943	6.9866	4.89146	7.44273	22.1163	8.32029	6.28824
15.0232	4.72273	3.8796	4.406	7.49421	5.20241	9.00126
12.7143	2.54881	5.23494	5.85317	20.5747	5.45536	6.53175
13.3986	7.46821	8.64474	14.0943	6.17319	4.63694	8.60129
6.14793	4.79734	7.16201	7.90146	12.8885	4.12475	7.08979
8.11698	5.40288	5.05027	8.94687	31.7543	4.90342	5.73945
13.9703	4.969	4.59748	6.19225	18.8099	8.57134	7.43527
9.81602	7.32614	6.14891	5.34117	41.7176	4.72117	4.8996
12.979	5.14611	8.29054	10.3508	6.29765	6.83674	5.80907
5.97553	8.02295	4.57935	5.38153	6.22936	12.2087	7.78073
7.66491	6.17436	4.75017	8.08022	19.8089	7.07205	9.4163
18.2492	5.21869	6.51154	9.07381	10.8957	6.25825	6.91523
15.5138	7.34709	6.31377	5.21157	13.255	6.51225	5.42895
15.5246	14.4863	6.09929	5.39527	17.8397	6.21223	8.56023
6.72846	9.69148	5.61125	6.51134	13.4396	4.51791	5.88845
3.35813	3.42406	9.20673	3.61088	19.6859	5.55197	5.24571
10.5967	4.65592	6.30896	6.02207	30.4467	5.62973	7.95606
4.1967	9.1892	4.57116	14.4503	14.5387	3.52747	7.241
6.73601	4.95678	4.06545	17.1649	14.694	6.78363	8.70815
5.29279	9.26445	7.69993	24.134	7.07179	8.16823	7.32049
6.84586	7.24372	4.00746	21.6024	22.0385	4.18827	8.5995
6.91528	9.76838	5.55013	6.14726	10.3954	6.31834	8.07531
9.11273		5.38216	8.32874	11.5781	8.49612	8.88871
7.42507		5.86381	5.04964	40.2562	5.16965	13.5162
9.11647		3.7074	4.70761	20.5231	6.21956	8.82892
7.04894		4.20857	7.73614	38.105	6.60383	5.8494
8.10772		4.85827	6.1866	9.60395	8.5587	8.03222
10.9215		6.07482	5.89073	5.75323	5.99333	6.00633
6.37768		4.59411	2.2617	37.0917	5.4309	8.20631
8.2633		5.13042	3.68207	4.52006	5.36779	8.99515
7.52092		4.73833	4.52839	12.5394	6.35043	6.67319
4.58832		3.7768	5.87583	38.4001	9.47548	6.79012
5.87224		2.47542	4.10757	8.34922	4.51288	11.2855
6.10253		3.61928	8.88631	36.4819	5.05847	9.02395
11.2664		3.30048	6.32009	12.1905	5.05336	9.51845
4.30712		3.08632	5.52386	15.5647	4.78	7.44192
5.62137		3.51318	3.6316	8.65339	5.79813	9.20837
6.1087		5.59281	5.77841	12.0555	6.50916	8.97291
12.8474		3.66135	2.59298	11.0228	4.27408	9.66901
17.013		5.65166	4.97979	15.7273	7.83941	7.77764
7.49572		4.7999	4.81856	7.92007	9.32277	8.44966
4.63792		2.51721		18.9914	11.3849	9.8331
8.87471		3.1028		10.6483	5.86378	8.42061
14.7239		5.2424		11.0735	5.15745	9.07366
12.2147		6.39593		7.64471	6.09948	13.4583
8.67103				12.3568	6.02539	10.528
19.2111				13.2087	6.58307	15.4102
11.1077				15.9441	8.76191	10.9297
12.6859				12.008	11.974	11.0211
15.5105				14.1138	5.33888	9.94766
18.3515				17.0506	7.19143	8.71307
17.549				5.77061	6.05969	11.3774
9.20956				13.1258	5.91208	16.05
19.544				8.47787	9.21599	12.6436
5.58703				15.4133	9.95692	19.03
5.5336				12.05	5.36135	13.6513
6.33699				11.6376	5.51769	12.2456
7.44569				13.7561	16.0537	7.6258
8.77297				10.2924	16.0381	6.41701
12.5199				12.3811	7.83154	3.5923
5.06127				12.7465	14.3576	5.79244
10.7643				10.8004	5.13741	4.79789
6.55954				13.7421	6.15652	6.523
10.9711				15.1342	4.20161	5.50616
8.83426				7.51985	6.30906	6.0156
6.17607				11.8482	5.57473	5.20342
12.3373				6.57787	5.33653	7.67561
7.20765				32.2253	4.64303	5.79365
8.7918				12.1207	6.01409	7.29493
7.29608				17.5716	9.82645	7.18599
6.66828				8.6107	11.4972	5.75962
7.17588				9.14108	6.16533	6.62053
5.51735				8.2633	5.76644	8.64646
7.81324				8.00984	3.99509	7.3051
6.20065				12.8973	5.95347	7.58639
				12.4372	5.43807	6.20428
				8.94188	5.67202	6.52773
				8.24268	6.29457	6.42781
				6.18338	7.33141
				13.2921	4.8344
				11.8096	6.67691
				6.4462	7.758
				10.7402	7.39368
				13.3977	7.12907
				8.86821	10.0119
				11.9473	8.61365
				8.92282	4.39138
				12.6335	5.91047
				16.155	6.96601
				18.824	7.25442
				12.8807	6.92361
				8.37086	9.32365
				12.4987	6.42426
				6.89462
				32.1413
				59.6187
				14.6179
				14.7947
				10.2495
				37.3019
				19.6989
				51.9609
				21.7718
				15.4952
				13.8767
				20.0282
				21.7827
				10.7953
				14.5662
				15.4999
				11.5294
				11.3209
				21.453
				14.1414
				12.2123
				27.214
				16.1768
				14.9871
				14.152
				9.08817
				14.6497
				12.3339
