# Supplementary material for: Ongoing repair of migration-coupled DNA damage allows planarian adult stem cells to reach wound sites
Source: eLife journal article supplement (doi:10.7554/elife.63779), 2021-04-23
Supplement: fig2-data1 [file Fig2_Source data_3_2F.xlsx]

## Sheet: Fig.2F
Fig. 2F	Non migratory TUD!- cells
Shield 0 dpa	Shield 4dpa	Migratory 4dpa	Shield 7dpa	Migratory 7 dpa	Shield 10dpa	Migratory 10dpa		Non migratory TUD!- cells
3.57876	6.37192	13.2458	4.95424	7.75452	6.45823	7.49881		Tukey's multiple comparisons test	Mean Diff.	95.00% CI of diff.	Significant?	Summary	Adjusted P Value
7.33551	6.05117	11.9167	12.6482	12.1725	8.19238	5.94977		Shield 0 dpa vs. Shield 4dpa	0.9777	-0.1570 to 2.112	No	ns	0.1445
6.00204	13.9091	7.88613	13.0454	9.65194	8.43598	3.00559		Shield 4dpa vs. Migratory 4dpa	0.5638	-0.5150 to 1.643	No	ns	0.7184
5.94472	21.4329	9.35863	17.2916	13.4117	5.53435	4.88374		Shield 7dpa vs. Migratory 7 dpa	-0.7514	-1.875 to 0.3723	No	ns	0.4314
8.25798	2.4644	11.909	16.8741	11.813	7.60476	6.59995		Shield 10dpa vs. Migratory 10dpa	-0.6052	-1.748 to 0.5377	No	ns	0.7056
7.17049	4.29123	9.23006	8.74047	9.01759	4.827	6.29368
7.22466	7.90592	9.28472	15.6188	9.20145	7.39105	5.72127
6.29996	6.14428	9.77491	11.2254	7.17883	6.20901	3.71569
8.9388	8.63203	8.61395	4.71265	5.85606	5.82453	4.1827
8.21786	13.7907	6.74555	8.34899	8.91192	7.26092	7.13999
6.45567	4.30068	11.4253	14.8525	7.0351	6.62986	6.68586
7.05018	8.04152	13.3219	11.7702	7.75528	10.0306	4.48769
6.91583	6.92829	7.49214	7.998	9.48813	5.96105	5.6988
6.51739	3.86002	7.41891	10.5013	7.42917	10.3466	6.08341
6.64535	3.315	8.43726	11.9968	7.01393	9.64392	5.17048
7.85014	4.30369	8.40686	11.0223	8.02251	7.56746	3.51388
14.2452	7.21777	22.4414	14.7858	3.20944	6.57785	3.97609
9.86034	8.98463	3.66099	28.0337	9.38996	8.97493	5.25802
7.02667	9.15509	7.20385	15.7478	7.86414	7.63787	9.01428
8.04045	4.39942	4.70383	15.3714	6.72819	6.9515	6.49949
8.43265	9.25439	6.16729	13.5844	8.81557	5.31296	7.45614
14.6045	5.86185	14.2727	19.5029	10.644	6.72047	4.62662
5.16651	5.50255	17.809	9.74837	4.54839	9.29895	3.99027
4.41745	5.71101	14.0536	21.1312	13.3207	9.62565	5.79763
4.64689	5.67147	9.12293	11.1566	8.9472	11.4148	7.38558
9.27445	3.21804	8.57182	18.158	9.09113	4.56077	7.21432
6.54547	7.18464	6.93265	11.7261	5.66186	6.67647	5.02639
17.1136	6.46415	10.1906	12.6486	7.30215	4.56895	4.30397
5.87832	5.42797	6.05234	23.0852	9.7876	4.57143	9.57842
3.68265	6.94784	6.03837	16.6211	10.4764	5.25422	3.78585
5.97276	6.81096	23.1286	12.0759	7.13272	5.24823	4.81895
9.50863	6.80804	20.5516	13.725	8.83546	3.40599	7.21951
6.94072	3.04831	11.4201	13.9518	7.05126	5.11112	6.8753
10.0609	7.18916	6.61194	7.06485	8.73371	5.68335	4.00746
8.87784	7.0911	11.9658	10.9444	7.58528	4.45308	3.7328
7.31226	6.70948	5.00551	9.19067	9.43694	5.43816	4.71081
9.83553	9.95327	5.40841	12.3415	8.31055	3.83407	6.60371
8.11477	7.91104	4.4574	11.8974	4.83744	5.06693	7.21826
3.37108	7.88964	7.07562	7.97302	7.47537	4.99591	8.41373
4.54427	8.36377	9.99343	9.55591	11.7169	3.58904	5.68195
5.76928	5.60395	10.7706	7.21823	9.25491	6.17184	10.7933
9.44375	11.221	6.04357	17.9558	4.90519	4.12708	8.70963
6.60095	6.73391	3.3188	9.85262	10.1001	5.744	7.84715
4.53738	9.98383	6.39281	6.52599	11.7827	5.2438	9.7993
16.8522	9.23018	11.5123	10.5724	10.8886	6.26363	17.3152
4.59609	17.0389	11.0884	5.75353	6.6284	8.61575	9.17663
4.19263	8.30481	8.43975	2.70656	6.22476	10.3567	4.47306
4.90806	6.4535	11.3837	4.08012	5.39301	12.0487	6.25074
14.3371	7.84456	8.87136	7.96496	11.1021	9.53048	11.1712
10.669	5.86981	6.11982	8.62019	8.78859	6.23387	13.9252
4.75827	11.0335	7.81977	8.07063	7.39641	5.89575	5.09349
5.89699	8.27242	9.28027	13.9595	6.33105	10.6832	7.52041
2.35959	7.41606	11.6532	5.71101	7.40825	9.16283	8.43566
4.16174	15.7518	8.28089	6.83839	10.6079	10.769	6.87453
4.72267	13.6147	16.4448	10.5528	8.66954	6.58471	4.96649
3.62958	16.1716	8.1984	15.5933	9.67735	6.14185	6.88856
6.47883	3.96049	6.88455	8.0125	5.55033	8.77299	9.7636
7.43108	4.76015	7.05844	5.72096	10.6118	3.99673	9.2884
19.6635	6.36085	9.2972	3.43008	5.08385	6.27216	18.0203
18.6844	8.24083	11.7876	6.34575	7.4236	5.91095	5.80111
5.80237	8.29715	3.33867	14.3356	8.50079	3.27251	6.36036
3.28074	7.58993	10.0692	4.79176	7.55556	5.25604	8.86037
6.82109	6.90086	7.18519	4.85395	7.88489	6.28386	6.12249
13.9781	5.82148	10.1777	3.27554	10.841	4.30415	5.93429
8.29367	7.7582	11.8686	8.83234	7.46091	3.05685	4.79709
21.3375	14.7332	9.96206	8.21439	7.7864	5.26114	5.69043
18.4426	13.8253	6.73077	5.33261	7.79008	3.42217	5.57828
16.9409	16.9668	6.11571	5.47146	9.88226	7.94157	8.1742
12.0364	8.80757	7.75095	3.70389	9.05453	4.02074	6.74605
21.9395	13.7215	6.18222	4.17112	10.8189	6.54005	8.62758
17.484	9.36173	5.11419	10.6006	8.49493	4.78099	7.72104
10.2898	5.16905	9.59038	8.84601	8.72108	6.33742	8.99193
9.44762	11.5589	8.66202	5.73189	8.76983	8.97826	9.04724
9.12259	9.58348	8.44321	4.91865	9.89029	10.4576	6.89056
3.47278	6.98882	4.21119	10.4106	5.0811	9.37333	9.98948
13.9627	5.46151	4.72838	2.36549	9.38985	8.86359	10.3084
4.37511	6.53253	11.0284	3.45949	12.9962	11.8525	9.13321
8.47987	7.8862	11.8934	3.62305	3.26987	13.3706	5.55949
13.0555	6.81064	9.3992	7.04339	9.02016	8.23585	8.10789
12.6935	4.92129	3.52087	8.20007	9.66384	8.96056	14.7588
22.4396	7.70663	3.97469	8.55862	7.53727	5.49795	5.86999
6.0812	9.83178	3.03309	14.3964	10.9255	8.24292	5.10916
4.78703	4.9911	4.18269	7.96522	11.9784	3.48762	5.74235
17.3122	7.6442	5.28569	6.61248	9.5581	4.28566	6.16041
7.92169	6.67999	3.52087	7.91066	7.81321	5.19792	6.7789
6.27788	7.99986	4.40086	7.2477	7.95233	7.69763	9.25048
4.74159	5.9773	5.70272	8.91455	4.90083	6.49709	9.71788
6.43748	11.2672	4.9869	13.1061	8.18993	7.91938	7.4614
7.28558	15.7587	4.16457	7.93076	6.75737	3.57281	12.5311
5.32282	4.89767	4.92527	4.06419	8.57674	4.86479	6.81482
3.6744	6.00258	5.06611	5.34347	7.42347	2.91764	9.99608
6.03051	9.61113	7.37765	5.35531	7.07535	6.03797	9.17671
12.1336	10.1228	6.56464	10.2263	7.74712	11.3399	8.28373
5.62164	8.76637	5.28139	13.1612	7.64026	7.65368	8.93088
13.2226	14.9349	7.91237	11.838	6.08244	4.48023	9.02526
6.64766	13.7382	13.2651	16.0152	11.5428	7.36527	7.44192
6.81833	15.5983	8.05001	13.6439	8.87658	6.13714	10.2767
6.90572	8.88607	6.65362	2.2175	13.3494	3.29939	5.79327
12.4419	6.29962	3.16494	12.609	12.9882	11.0018	13.0268
9.46118	5.8356	5.7415	6.27351	10.4544	12.7244	11.0278
6.78493	7.6341	4.98545	4.61763	7.08155	7.78266	13.1041
13.8443	7.78308	8.97411	5.51256	13.0659	20.3782	7.90589
7.75842	5.75068	5.18157	17.4305	11.317	5.66556	12.5104
7.59784	10.4359	6.41202	12.8832	11.1331	5.24932	6.08939
5.18713	15.5952	7.79174	7.1646	9.41358	7.38515	14.9709
6.53629	10.8213	6.01153	17.5323	6.82685	4.74305	8.80898
6.20341	7.69297	10.9075	5.47006	12.9228	3.86361	9.60887
7.37784	13.2521	7.35665	9.82376	19.7281	5.54732	13.549
8.10746	9.86038	5.17619	1.47316	5.67383	7.9518	7.39645
14.6471	13.8229	7.64979	4.76098	7.82415	9.64628	6.94099
6.80524	7.45658	5.25639	4.70389	10.0997	9.59301	13.2651
10.9019	6.85999	4.45531	5.88257	12.5759	5.63263	5.68817
13.7314	8.80831	4.12577	2.30825	8.52196	11.7052	5.61452
9.67222	7.59652	5.38547	2.80706	10.4768	18.9958	11.9024
9.33546	7.02808	6.93341	4.44426	13.7081	19.0506	9.20264
11.3216	7.41717	3.64588	4.02646	7.66301	12.6471	3.31177
7.25481	12.9075	7.27917	4.56687	11.1245	10.1616	6.58282
4.47474	6.02592	2.7061	3.56543	4.32861	17.9479	9.65664
10.529	4.5826	5.69078	4.01046	7.49139	16.2377	7.38374
4.8661	4.07399	4.28915	6.51854	10.35	13.3324	8.12589
10.1724	5.33522	3.77701	4.46381	8.20912	8.72375	7.44274
10.248	6.55907	3.71774	10.1033	18.2443	7.48206	9.73004
7.93534	6.35356	5.72649	13.8609	10.3282	15.4947	7.31815
6.04612	8.66966	4.76067	6.57652	9.39944	11.9944	9.33302
12.8372	9.24201	3.34385	18.1528	10.1269	6.52861	10.2398
7.41803	7.55008	4.64251	10.4599	21.5544	7.30354	8.59078
9.42446	5.52568	5.75098	18.0239	10.9009	3.34364	10.1666
7.29504	9.5202	3.66832	7.46054	11.2256	6.99837	5.52538
14.0627	11.5333	4.57823	9.6251	12.0973	5.88253	13.0393
10.5768	8.02768	5.19749	4.75245	8.54303	7.28783	14.5769
8.63099	5.55614	4.11885	7.49935	12.7394	5.97613	9.50785
12.9932	6.0541	5.59176	4.19393	14.3402	5.11454	5.77756
6.35189	10.0439	4.00053	11.6018	8.44016	6.00106	10.0321
9.21398	8.90677	3.46647	11.4157	8.77942	7.27767	8.2578
2.96005	7.38019	5.1646	15.0781	5.89651	8.98847	6.79399
10.7052	4.4946	6.72525	2.74559	8.6705	6.4487	16.6161
10.5532	9.1946	5.89527	8.02575	12.2468	7.10692	10.81
5.22609	5.66944	3.24752	2.80455	5.62677	4.73818	17.6622
11.4922	6.07393	7.46563	3.37804	12.6836	7.28696	10.5222
16.6744	4.82847	5.74347	4.89718	17.7533	5.14772	11.639
16.3504	8.18006	3.34922	6.34395	13.8074	4.81015	23.8382
8.40637	12.3653	3.74866	6.90902	9.21223	6.1155	6.99307
13.0229	7.17784	3.71553	2.99889	9.67674	3.66214	8.65215
12.6402	11.1771	3.0387	5.13032	13.2197	15.1896	13.4398
13.5945	6.9982	4.39545	5.85916	13.5607	9.43293	6.01764
20.7904	8.60067	2.76544	5.62432	17.2479	10.1321	15.2781
8.92823	5.67884	3.45028	5.71695	16.0883	9.37682	11.94
5.73866	9.63575	4.09415	9.52379	6.87035	8.08109	13.1763
11.2157	5.38407	4.63964	7.05481	14.1755	5.94411	10.2517
7.36975	8.42591	3.8345	8.57281	12.0814	6.09946	7.17996
5.35894	8.60439	4.1654	6.48302	10.3477	7.86679	16.6554
5.49281	7.49477	3.60997	14.212	10.0221	4.38958	9.42975
5.95516	8.95585	5.01417	7.49135	8.91595	5.0758	5.87264
6.44055	12.4785	5.70005	8.494	8.68085	5.10058	4.09349
6.1504	10.2031	6.61522	7.0054	12.4171	11.3879	6.47489
5.85867	5.22489	14.1941	5.45667	8.68589	7.41806	5.36483
7.65196	9.49549	6.88655	6.89211	12.0086	9.57654	5.97758
8.1701	11.1561	6.20898	7.8142	9.07447	12.4701	11.4748
10.876	7.19353	6.26523	4.5012	7.03679	9.70335	8.29478
10.8582	4.45917	7.78985	9.33144	8.35341	13.4879	6.39644
	10.4907	6.13051	15.862	11.1067		7.52347
	5.2236	5.8065	7.70734	9.22244		7.58979
	6.41526	4.88162	7.53916	14.2098		8.60183
	5.956	8.29035	10.4063	14.8492		7.11212
	5.7384	5.2035	3.80306	10.5552		12.3031
	7.32107	7.07838	4.50209	15.8514		7.91603
	8.76886	6.40212	6.34414	13.9487		6.13218
	5.33164	7.37461	12.1185	11.8997		4.60659
	3.39666	7.26951	7.30075	10.4897		6.01094
	4.39267	6.22341	7.05827	12.9309		9.04259
	9.11941	4.72916	7.84841	11.9318		8.60115
	5.15491	4.57926	7.77857	13.7886		5.45673
	9.50229	6.33502	5.80123	9.55424		6.55302
	8.47201	10.3094	7.27354			5.24051
	5.20819	7.31872	6.26992			3.73974
	4.86948	5.54212	7.79161			5.49722
	7.16781	11.951	7.63319			5.9973
	4.69323	6.80767	9.53135			7.42817
	4.07271	11.6247	16.8533			3.9289
	4.6481	6.16383	6.75898			6.59825
	7.72271	6.95496	3.49995			15.9067
	5.5434	12.933	9.62285			9.98309
	4.53906	4.49425	3.88058			8.10281
	3.9546	6.11849	7.15187			9.24916
	7.62617	5.69799	4.97204			10.938
	6.57245	7.57102				7.74193
	7.86201	11.6746				5.76185
	5.09288	6.22103				7.70036
	4.47209	7.91164
	6.45906	11.4209
	4.89025	10.8615
	2.7364	8.13518
	12.1554	9.66749
	7.30081	6.79163
