# Supplementary material for: Ongoing repair of migration-coupled DNA damage allows planarian adult stem cells to reach wound sites
Source: eLife journal article supplement (doi:10.7554/elife.63779), 2021-04-23
Supplement: fig2-data1 [file Fig2_Source data_4_2K.xlsx]

## Sheet: Fig. 2K
COMET assay data						Unpaired t test with Welch's correction
%DNA in tail per comet						P value	<0.0001
						P value summary	****
n=624	n=597 cells					Significantly different (P < 0.05)?	Yes
Intact (624)	Wounded(597)
16.31	26.85
0.45	6.87
11.62	23.77
6.49	24.55
8.33	47.98
23.2	10.5
9.26	16.42
3.57	22.6
13.46	19.54
49.87	29.15
16.87	29.12
21.68	14.63
11.49	3.05
26.97	24.11
7.91	0
34.15	22.94
41.57	35.8
10.79	19.44
13.25	23.04
28.37	27.06
11.91	42.58
13.19	68.05
14.86	10.95
16.18	51.75
11.26	3.45
23.81	45.51
19.47	4.52
1.4	1.67
17.47	26.17
19.6	50.28
22.42	46.55
32.09	58.59
22.98	29.66
21.34	54.76
9.62	13.58
5.91	16.68
17.85	13.01
8.85	58.08
16.23	18.3
3.13	2.9
23.2	15.31
7.03	5.62
8.01	39.35
23.27	50.44
13.54	55.23
15.22	18.55
0.68	45.85
30.2	14.97
12.58	60.53
16.69	14.64
16.51	37.49
32.04	67.11
29.42	53.42
28.33	29.33
0.02	23.56
0.13	28.49
8.48	43.7
9.61	29
19.87	0.89
43.99	46.48
11.21	30
15.73	14.31
5.74	18.53
3.99	8.31
5.81	38.9
33.17	56.31
8.9	4.63
7.02	0.07
9.51	11.94
5.95	17.39
5.04	15.58
1.71	42.45
9.16	29.64
21.67	36.65
19.91	27.93
4.04	49.13
30.96	30.54
16.07	39.95
26.86	1.76
19.76	15
37.93	19.97
8.05	46.5
10.2	20.17
7.13	53.47
23.17	16.78
3.65	32.62
24.03	38.63
8.2	41.73
29.73	9.02
14.57	30.8
28.34	38.02
41.74	49.94
12.48	17.11
43.33	2.49
36.09	19.07
0	6.68
34.22	40.73
34.44	56.98
37.84	64.04
18.8	25.76
5.71	49.41
13.39	56.51
13.86	68.37
3.39	46.88
46.83	3.28
9.44	7.91
13.98	13.76
7.99	17.65
20.41	15.01
0.66	2.81
30.59	24.28
3.1	17.31
5.17	26.1
14.74	5.69
0.37	5.68
9.12	1.29
18.95	5.55
7.54	9.12
11.12	0.64
0.58	23
29.24	0.94
20.31	3.15
9.68	16.42
10.96	6.91
2.92	8.43
15.58	15.01
12.67	58.1
25.23	43.05
26.04	0.04
30.01	10.58
43.71	30.47
39.85	4.18
25.5	4.04
12.94	13.9
21.96	4.4
28.65	8.39
26.62	29.44
29.97	0.94
45.81	16.42
36.92	5.75
10.66	18.63
16.55	43.23
1.15	24.39
7.45	22.19
21.38	19.03
11.84	26.74
27.89	4.69
7.8	11.04
10.39	8.22
25.57	5.52
5.21	28.68
19.39	5.72
18.05	38.97
25.73	23.2
34.25	35.14
13.41	28.39
38.91	38.86
32.28	10.06
6.78	2.29
16.68	43.71
0.47	47.82
15.93	11.99
15.36	20.12
17.25	0.89
11.01	27.47
5.68	9.28
10.07	10.36
9.7	0
7.47	14.17
16.7	27.16
14.96	9.03
24.83	45.68
9.17	15.9
27.09	25.85
4.07	5.72
18.31	6.21
20.04	1.2
11.26	10.29
9.06	18.5
27.84	2.23
5.13	45.27
6.26	39.71
26.83	51.23
17.13	21.96
3.05	54.6
46.14	8.8
14.49	13.31
46.65	29.7
46.5	2.9
15.5	21.45
11.54	43.29
10.07	24.32
27.67	16.7
21.74	9.2
16.61	25.11
26.51	18.85
17.84	3.06
33.16	16.4
24.59	34.84
42.12	38.81
11.48	14.48
6.96	9.11
4.87	0.22
3.19	5.28
8.44	15.46
35.87	13.63
1.87	26.66
6.49	43.87
1.83	17.42
15.95	16.7
9.51	11.82
8.98	2.18
13.94	34.57
15.69	19.47
4.75	8.46
6.29	27.35
5.79	25.52
11.55	10.09
17.56	17.35
5.87	39.33
13.44	38.17
2.95	51.96
8.75	0
4.62	30.44
38.6	28.53
10.73	13.08
11.25	11.64
11.53	6.81
4.12	28.06
19.82	20.23
30.28	7.56
19.33	43.09
4.18	2.14
6	4.28
8.71	24.41
9.18	13.37
25.06	23.97
16.8	7.56
31.65	0.62
30.53	15.46
19.77	4.51
47.09	5.13
0.82	21.17
1.98	2.24
2.52	6.5
5.09	28.85
20.61	35.6
8.14	9.8
18.8	23.49
8.38	26.49
25.58	72.83
48.72	4.27
0.2	13.02
8.99	32.2
33.48	31.77
11.68	11.53
1.38	67.44
5.02	41.08
20.37	47.62
7.62	59.51
19.46	40.21
7.7	55.7
24.33	49.26
8.89	27.27
0.5	61.12
8.85	31.37
17.07	55.18
3.56	31.28
7.34	35.53
29.65	21.19
14.11	36.66
5.84	4.89
0	24.95
2.43	47.74
12.27	33.13
5.93	33.66
19.82	59.21
46.02	17.65
28.33	1.49
6.39	65.18
11.93	48.56
8.26	62.06
30.68	64.24
1.38	69.46
33.89	57.62
19.48	61.53
5.6	65.18
15.73	36.61
6.03	66.63
23.48	69.02
2.58	17.24
5.47	22.53
12.23	29.43
0	22.81
6.61	14.44
29.21	20.77
14.78	4.02
38.71	0.23
19.2	3.17
44.13	15.18
2.13	11.81
2.07	19.81
7.98	36.15
4.23	14.97
5.23	38.1
2.31	7.04
13.44	82.52
3.12	8.16
14.11	19.82
7.42	57.31
31.25	16.08
4.82	21.16
3.98	29.39
1.21	12.99
1.2	6.05
8.45	60.14
19.49	46.91
7.96	44.08
14.21	66.34
12.22	23.03
2.22	44.26
10.74	20.3
16.09	10.25
7.53	43.37
25.26	7.57
5.55	1.93
44.47	29.76
14.83	46.82
35.45	37.36
11.87	11.52
21.43	48.44
6.18	29.64
23.99	40.03
8.39	20.76
20.06	64.17
33.52	27.93
2.89	31.91
7.59	33.03
8.63	20.15
4.37	18.41
19.29	33.17
24.05	10.78
1.94	52.2
28.11	2.98
32.1	0.41
29.32	7.07
14.52	8.18
36.61	18.97
40.93	44.49
36.08	1.85
8.21	40.76
17.94	5.42
3.84	8.21
1.05	32.7
11.2	2.68
47.22	43.36
0.39	72.55
12.5	26.55
20.7	51.15
16.35	6.37
29.74	6.05
16.25	76.36
1.86	82.7
15.01	38.49
6.02	44.28
6.3	20.07
8.12	46.54
0.88	62.56
9.25	42.43
16.15	73.42
1.54	75.69
18.63	18.75
3.59	27.18
22.06	1.77
26.48	58.37
6.71	61.69
24.07	23.92
15.84	30.29
18.35	40.42
44.94	14.35
13.55	3.96
5.38	2.18
6.8	36.47
28.47	45.96
33.87	0.4
14.15	63.91
26.83	27.03
21.77	14.24
9.4	17.82
17.27	60.46
11.2	28.91
8.36	58.58
5.97	18.58
13.09	2.41
13.37	49.84
12.27	42.19
9.12	36.13
6.86	65.77
4.83	72.12
26.45	23.77
1.48	29.67
6.23	13.57
15.25	40.66
2.59	33.66
9.99	32.85
12.13	63.82
7.65	61.18
7.83	22.12
10.06	28.48
2.16	45.45
0	35.68
19.14	26.06
27.41	20.99
15.35	29.98
58.91	59.68
24.73	57.47
35.07	35.44
24.4	33.21
28.08	25.17
5.17	8.64
45.86	11.34
36.11	33.46
29.14	28.5
38.76	11.46
6.06	54.61
12.84	58.69
24.51	56.2
10.12	27.45
11.81	16.48
16.87	29.44
10.87	1.81
8.99	40.68
0.59	34.51
16.33	50.95
12.41	62.56
5.88	56.07
11.95	8.17
11.34	19.21
5.18	22.05
6.56	52.54
32.28	5.66
16.51	0
7.17	13.33
2.51	68.25
27.53	40.78
12.09	8.84
31.82	7.91
7	10.39
3.01	58.94
15.73	49.76
6.37	8.1
2.67	11.83
24.44	29.72
5.73	16.8
10.55	13.57
8.89	20.54
9.07	16.49
9.94	6.17
6.85	21.41
5.59	34.65
35.03	17.49
23.87	24.06
9.3	27.56
4.88	35.07
10.17	59.08
0.58	27.79
28.66	11.45
13.5	56.82
7.18	16.32
0.46	3.23
1.92	16.51
16.23	32.72
37.28	2.8
9.44	47.28
1.55	52.99
21.47	34.72
17.64	32.58
39.91	34.98
8.79	47.53
28.52	31.65
32.5	52.35
8.28	18.68
16.74	42.64
10.74	61.47
18.35	51.3
0	20.97
5.69	22.71
19.82	60.92
1.8	49.45
22.86	45.95
12.95	58.56
15.79	20.67
19.22	35.34
11.93	58.28
2.26	54.64
15.15	48.73
33.71	23.78
28.08	5.79
12.62	53.64
17.18	67.88
11.49	59.16
25.09	0.87
37.09	0.7
29.81	1.27
40.95	22.54
12.25	0.51
42.51	0.26
22.15	66.48
13.75	45.71
21.24	52.85
15.93	47.75
19.72	1.81
40.96	2.99
8.04	1.64
9.46	1.57
71.93	5.12
14.96	3.44
23.44	11.16
45.82	13.68
35.39	1.4
12.56	1.28
8.52	1.21
73.77	50.23
35.36	53.12
52.03	40.25
71.35	36.11
2.29	6.53
16.89	7.86
3.61	0
15.95	1.26
4.15	6.41
14.95	5.6
18.88	7.32
14.35	13.54
0	15.06
22.16	0.85
60.41	13.39
14.67	3.32
9.62	68.64
1.5	25.49
12.93	1.16
22.11	29.65
3.84	25.04
7.22	9.4
27.85	14.13
4.98	9.96
6.63	7.49
10.39	7.93
6.13	9.35
13.03	47.43
5.12	24.52
5.19	29.46
3.18	69
31.69	2.74
15.74	3.79
23.27	2.54
19.97	4.64
5.7	62.31
15.59	63.2
14.16	43.38
14.64	33.73
25.24	59.15
25.59	63.32
4.62	33.14
30.82	51.1
18.02	31.69
29.46	63.09
3.55	71.11
36.44	49.9
5.72	53.38
25.42	58.04
2.09	1.09
44.14	0.05
20.1	65.31
28.77	53.26
43.5	2.21
2.43	49.04
21.89	57.87
30.72	53.5
15.92	55.44
20.45	31.22
9.19	30.18
9.13	38.13
9.31	41.83
16.62	62.06
32.3	28.77
11.26	41.26
3.01	50.7
38.68	63.22
20.06	40.2
7.7	26.45
13.97	50.43
31.26	49.07
19.4	27.39
11.83	46.89
5.93	31.13
7.59	58.67
15.72
10.71
9.74
14.69
4.43
3.64
7.24
34.64
20.17
18.66
23.08
1.88
25.98
31.01
49.94
27.8
7.92
35.13
25.83
1.92
24.2
8.69
27.59
37.27
2.12
2.61
13.4
