# Supplementary material for: Ongoing repair of migration-coupled DNA damage allows planarian adult stem cells to reach wound sites
Source: eLife journal article supplement (doi:10.7554/elife.63779), 2021-04-23
Supplement: fig2-figsupp1-data1 [file Fig2_Source data_5_panel E.xlsx]

## Sheet: Panel E
Effect of 1.5 Gy IR on stem cell number
smedwi1 cells/mm2
0 Gy	1.5 Gy		Unpaired t-Test
2528.51	2145.09
2573.57	2441.69		Unpaired t test
2285.19	2365.63		P value	0.3148
			P value summary	ns
			Significantly different (P < 0.05)?	No
