# Supplementary material for: Ongoing repair of migration-coupled DNA damage allows planarian adult stem cells to reach wound sites
Source: eLife journal article supplement (doi:10.7554/elife.63779), 2021-04-23
Supplement: fig2-figsupp2-data1 [file Fig2_sourcedata_6_Panel C.xlsx]

## Sheet: Panel C
	Relative distance migrated --->
4dpa/7dpi	Shield				Migratory
	40um	80um	120um		40um	80um	120um
	8.378	5.882	9.18		9.814	10.569	11.99
	5.52	6.76	9.265		7.077	7.269	5.53
	11.66	9.53	10.36		9.14	8.87	11.57
	6.36	4.987	5.77		5.9156	6.038	5.637
	7.808	6.74	8.3066		4.49	3.732	4.95
7dpa/11dpi	Shield				Migratory
	40um	80um	120um		40um	80um	120um
	8.427	9.175	9.398		14.38	15.601	17.336
	6.867	6.365	5.819		18	15.243	20.814
	8.24	5.0411	6.902		8.477	12.065	18.584
	8.536	11.04	7.09		9.818	13.8788	12.62
	4.36	6.142	4.09		14.674	25.099	14.12
10dpa/14dpi	Shield				Migratory
	40um	80um	120um		40um	80um	120um
	6.4022	6.24	6.44		5.235	5.693	5.23
	5.24	5.7	6.6		5.968	5.05	5.98
	6.7	6.12	6.23		8.03	8.2	6.907
	9.29	6.968	5.78		13.567	11.817	8.76
	7.34	6.32	5.91		7.11	6.5	5.52
