# Supplementary material for: Ongoing repair of migration-coupled DNA damage allows planarian adult stem cells to reach wound sites
Source: eLife journal article supplement (doi:10.7554/elife.63779), 2021-04-23
Supplement: fig2-figsupp3-data1 [file Fig2_sourcedata_7_panel_C.xlsx]

## Sheet: Panel_C
Figure 2-figure supplement 3
Graph-C
COMET assay data			% DNA in tail in individual comet
	Shiled tissue (7 dpa)
n=300	300	330	367	333	n=303
InS1	InS2	InS3	WoS1	WoS2	WoS3
0.74	0.92	0.56	0.8	2.21	1.86
30.3	3.53	2.59	2.05	43.21	2.96
19.55	7.89	36.57	2.03	59.53	2.24
1.84	45.14	0	7.38	17.89	7.38
3.65	15.05	17.03	13.74	0.11	30.43
1.25	8.68	20.38	25.03	22.52	27.97
3.95	2.35	33.63	5.14	26.48	13.33
0.18	29.12	4.74	0.95	35.77	9.08
1.11	38.05	4.96	1.04	25.83	2.2
0.33	13.04	5.29	3.66	28.95	16.72
3.02	37.83	23.86	40.84	4.44	11.74
17.76	7.59	4.75	4.78	33.38	3.1
16.73	0.04	2.73	13.83	4.65	12.69
1.9	17.79	27.5	23.14	0.41	2.19
1.65	8.84	78.86	21.3	33.62	0.12
0.74	1.4	56.52	32.27	25.78	17.37
35.12	1.06	5.56	16.89	10.99	19.28
30.88	63.7	22.76	23.22	4.57	29.3
6.6	2.16	5.53	4.88	36.43	13.71
1.69	28.22	7.55	5.01	0.61	1.69
0	0.01	4.47	29.36	2.43	3.84
20.8	23.86	1.75	2.23	21.52	9.78
0.41	7.81	4.53	39.92	2.44	8.12
0.83	2.49	5.64	13.84	5.11	2.78
4.49	20.08	2.69	17.76	5.34	0.63
5.02	14.35	15.8	2.18	4.24	8.67
2.19	2.22	12.36	7.82	39.73	33.03
6.44	64.32	7.32	23.41	7.76	3.75
1.77	2.02	42.17	40.8	42.7	30.75
2.19	2	53.92	6.8	16.02	5.18
1.87	24.14	60.26	1.76	36.21	25.95
2.21	2.14	45.6	1.53	5.88	11.5
4.6	2.58	17.97	1	7.55	1.53
53.12	7.76	13.71	23.96	18.54	22.94
58.78	23.21	59.45	11.54	40.02	16.9
64.4	4.46	12.43	5.39	6.29	15.44
57.12	42.05	2.46	0.81	9.6	8.72
7.74	60.78	68.14	8.92	25.5	26.11
70.15	66.83	76.79	0.04	22.1	10.95
32.84	70.33	62.09	3.55	18.55	2.98
3.02	21.23	46.59	12.89	23.15	22.63
8.4	26.49	4.32	9.99	11.82	22.13
25.77	30.45	71.33	5.15	36.78	1.15
20.55	31.68	18.7	14.86	6.22	1.49
17.34	32.69	15.99	3.17	7.25	20.8
5.32	51.98	1.82	4.37	27.36	26.34
10.65	62.43	10.45	4.19	46.74	26.24
3.28	23.94	19.34	7.57	1.11	2.27
3.56	3.47	33.8	31.08	0.69	17.7
19.48	7.62	47.04	16.87	1.04	22.46
24.96	0.78	3.07	11.46	24.09	0.19
3.29	2.41	26.6	32.09	46.99	2.22
6.45	19.37	8.36	6.6	0.76	6.11
38.36	0.92	0.07	3.76	6.36	11.03
62.71	6.74	28.01	19.06	1.61	2.71
4.1	2.55	4.84	0.64	5.76	0.87
1.85	12.64	4.09	19.21	21.51	7.89
0.62	0.37	18.73	0.38	0.75	22.09
47.78	4.63	64.79	5.62	6.59	11.23
6.3	3.95	36.26	53.42	38.75	10.26
4.45	2.34	2.98	3.22	15.01	25.22
7.08	0.25	0.51	3.02	0.82	5.59
36.08	33.77	6.92	39.65	51.49	1.65
2.64	25.62	3.96	6.43	0.76	5.94
18.81	49.17	9	14.89	5	2.84
2.69	40.86	4.36	3.27	7.48	2.8
2.59	42.25	8.42	3.8	21.17	10.61
4.68	3.41	5.6	10.59	1.55	13.73
16.65	13.1	3.34	48.37	0.19	4.94
8.43	21.48	23.92	15.14	25.62	0
2.25	3.52	2.68	2.85	6.51	2.81
0.91	23.89	1.09	8.14	13.64	8.27
29	6.14	1.36	9.27	1.27	6.72
2.73	59.82	0.83	32.94	1.4	1.97
0.77	3.77	0.78	0	4.81	36.28
4.93	41.68	5.8	0.43	3.65	4.61
53.58	5.52	2.16	2.26	8.55	0.47
13.11	3.91	13.29	22.01	2.65	8.34
10.56	5.26	34.37	17.18	6.57	15.88
5.58	6.26	2.54	17.21	22.55	1.15
0.97	2.11	12.77	20.69	14.64	11.08
5.67	0.52	1.23	5.26	29.24	5.66
42.51	1.6	32.22	12.84	6.5	1.13
5.05	8.54	24.5	17.72	22.08	17.43
8.07	25.42	74.44	2.72	19.55	2.11
5.04	17.06	15.8	19.06	1.2	30.9
1.77	32.16	1.78	18.68	28.4	1.58
70.07	42.68	9.44	6.09	23.54	1.95
48.73	0.28	60.46	11.37	2.67	25.69
0.98	63.84	13.74	17.33	4.45	33.2
60.34	41.08	11.39	19.53	6.15	29.33
54.25	65.51	2.51	8.72	5.73	13.95
46.91	50.13	1.26	19.63	0.63	2.76
21	48.73	23.11	6.57	11.31	32.96
53.17	62.03	14.42	1.69	1	62
5.79	48.94	16.69	19.25	3.74	3.84
23.31	54.13	0.14	7.03	34.5	45.43
44.6	76.14	1.71	14.91	5.77	34.77
10.56	23.73	13.36	27.37	15.79	9.29
41.64	0	1.03	21.61	0.43	3.91
6.99	0.22	20.04	7.41	5.86	1.34
9.5	3.18	0.93	17.98	1.51	1.04
7.16	1.86	7.44	16.31	18.77	0.34
12.47	1.77	4.81	18.18	2.67	0.36
11.39	1.14	0.75	8.64	0.54	2.1
2.46	2.39	18.1	3.83	3.43	2.23
4.51	1.28	0.21	0.84	13.82	3.48
1.42	1.16	0.37	24.9	2.54	0.25
0.57	12.82	0.49	30.4	0.64	3.32
7.42	2.08	7.81	8.13	2.31	20.79
16.54	2.65	3.96	1.13	2.06	8.51
20.25	0.46	0.66	0.78	5.02	2.37
6.84	15.4	6.78	8.29	4.51	7.58
1.84	0.86	3.75	5.68	1.87	1.68
10.95	56.11	3.51	2.32	3.76	0.73
6.92	1.45	3.82	2.47	3.37	9.98
1.21	9.19	1.56	20.58	2.83	6.13
11.57	2.4	21.39	36.82	4.22	18.47
2.61	23.45	62.42	10.52	40.56	14.35
8.96	1.52	61.63	5.12	27.76	3.14
3.38	7.25	37.14	0.9	13.81	0.01
10.48	1.83	10.7	37.2	7.45	1.56
2	16.53	56.29	34.71	5.64	0
2.44	14.33	34.46	18.47	1.16	19.87
0	0.18	3.2	2.17	4.99	4.2
1.13	4.41	3.55	4.19	10.22	11.67
13.29	9.38	5.55	14.79	33.63	18.83
11.75	3.86	30.19	11.4	9.37	14.73
69.19	1.99	9.36	40.7	5.4	7.08
20.92	27.84	0.94	50.95	3.51	7.03
37.18	21.38	3.28	9.25	4.35	3.3
9.05	3.08	67.89	52.37	5.03	0.81
56.84	2.91	21.09	25.99	25.53	12.74
67.9	3.62	1.18	0.37	3.08	3.31
76.64	1.03	32.61	26.71	9.74	12.68
54.65	1.13	57.98	31.08	2.66	16.43
48.7	0	4.01	48.62	2.98	0.33
20.54	1.96	0.48	5.98	3.57	8.36
67.83	0.61	10.32	1	7.35	1.93
68.15	4.52	4.04	15.57	2.06	23.89
46.24	9.56	3.58	25.61	25.45	3.75
10.78	24.06	18.58	8.86	42.28	4.29
26.46	19.65	19.5	37.11	1.69	1.8
63.44	4.25	47.04	27.99	12.82	3.21
9.13	8.34	2.43	2.48	10.56	8.04
73.98	7.39	6.75	0.97	22.66	7.51
68.41	4.27	44.25	30.8	10.55	3.06
18.18	8.48	1.56	4.9	7.74	6.44
21.78	2.55	4.74	1.82	21.25	9.34
1.23	49.16	57.31	13.38	1.3	4.38
0.33	57.69	73.18	0.41	56.98	1.51
5.03	40.04	3.01	0.99	7.44	6.46
4.78	52.17	24.65	1.99	2.77	5.38
1.8	44.77	52.7	0.96	64.14	30.08
10.03	6.83	43.89	0.35	10.69	0.39
1.63	5.82	34.93	31.77	5.81	6.48
3.8	4.23	11.04	17.94	38.22	0.09
6.52	3.62	43.66	3.34	38.46	0.31
2.98	2.5	45.05	3.3	38.47	0.29
4.64	1.76	11.06	6.3	5.26	16.95
5.1	2.49	35.81	0	6.16	8.84
0.49	9.13	12.43	10.28	5.81	10.06
3.7	12.95	1.34	2.52	7.37	22.2
0.41	1.89	21.04	10.29	3.77	2.48
1.23	5.51	35.17	0	2.73	2.55
0.19	1.42	10.57	3.57	3.71	15.66
4.1	0.84	10.71	40.99	4.83	9.35
6.94	1.68	1.57	2.51	0.13	13.35
7.15	2.66	0.7	40.53	1.8	12.86
8.68	1.88	19.4	1.07	4.68	15.72
0.65	17.76	26.08	6.15	14.13	3.64
0.35	1.31	7.83	5.01	8.46	20.08
1.85	1.08	48.8	15.2	3.82	6.79
0.69	1.11	33.47	2.23	11.24	9.83
3.07	5.52	1.1	27.06	3.41	31.81
14.03	0.95	1.94	4.87	2.27	1.39
4.02	26.9	65.89	4.07	12.2	13.24
4.73	3.31	0.44	34.46	7.78	5.14
7.48	0.96	32.86	12.34	2.38	0.92
14.33	2.31	14.47	1.91	1.37	0
4.37	19.79	20.19	33.5	2.1	36.92
0.46	7.88	5.07	19.89	9.18	52.83
4.37	3.75	6.87	35.76	6.31	0
35.5	2.42	22.85	21.8	24.83	11.31
4.71	1.39	45.21	1.13	27.15	0.69
10.94	2.42	25.46	9.07	8.39	4.24
1.72	0.49	2.5	1.74	10.28	3.59
64.61	22.32	1.31	1.58	4.19	13.64
16.16	1.89	2.69	8.68	43.74	18.74
8.46	1.44	0.37	11.23	54.56	8.07
16.8	0.82	24.75	4.51	56.4	29.3
35.29	0.4	49.91	12.98	24.1	8.29
21.51	28.75	4.73	16.4	36.94	5.04
44.56	28.07	0.98	23.19	60.64	0.52
6.88	54.56	1.28	8.52	57.65	1.75
49.58	10.92	1.44	7.2	37.8	18.43
32.01	7.76	19.18	20.82	7.93	55.98
8.92	0.55	5.5	2.84	2.63	20.45
10.4	42.77	3.11	3.95	19.72	3.09
4.96	9.94	16.8	4.14	3.48	23.13
2.35	5.28	7.16	15.62	6.56	2.93
3.38	8.52	2.19	6.02	17.97	24.36
16.15	24.53	7.97	0.44	33.32	12.76
19	4.4	31.33	1.43	72.16	1.85
2.25	34.48	9.02	1.21	45.43	7.89
15.83	0.7	0.89	6.77	11.85	14.22
23.51	9.85	0.26	13.15	7.41	11.25
3.83	3.15	0.61	15.74	11.47	2.3
2.95	3.2	22.25	30.41	39.33	18.25
14.58	9.72	2.93	17.5	16.22	2.51
1.71	13.63	5.67	0.83	1.98	0.52
2.89	2.16	1.48	3.63	2.99	2.58
1.73	3.99	12.56	29.96	3.28	5.25
12.3	1.92	5.76	16.9	32.15	7.42
3.66	5.34	10.62	6.79	3.76	0.49
12.6	29.65	1.17	13.1	13.57	20.87
9.42	7.37	8.73	29.33	5.15	3.96
34.53	2.74	0.73	2.97	9.11	0.38
5.64	7.27	1.33	1.92	1.39	1.64
34.08	24.09	0.37	14.98	12.78	1.9
2.03	14.6	6.82	7.31	23.88	13.26
7.04	5.49	1.45	12.12	3.34	15.84
22.63	47.41	14.49	11.83	42.97	0.12
8.22	3.63	1.7	27.46	21.92	3.15
0.06	0.65	4.62	5.08	0.88	19.12
26.01	2.07	2.13	3.15	31.65	3.18
39.94	8.65	28.72	8.36	61.88	0.61
5.81	5.36	47.09	2.13	3.59	29.09
2.99	3.99	21.45	4.6	1.16	2.25
11.81	42.84	11.4	32.61	3.41	1.83
19.05	5.26	0	9.8	5.25	4.31
2.45	19.03	4.49	4.9	15.5	3.17
37.73	10.65	27.32	42.91	18.42	1.39
4.93	45.41	2.19	4.15	20.37	5.95
6.39	4.23	2.29	2.61	2.01	2.85
2.51	37.86	7.57	31.28	1.44	2.55
1.74	12.32	28.75	25.78	5.79	9.35
1.46	4.06	4.45	46.99	7.91	5.34
6.64	1.27	8.35	61.22	8.74	0.85
1.65	0.59	1.67	32.76	20.15	10.78
0.38	9.52	43.69	6.5	2.02	7.29
2.42	5.92	0	9.85	10.17	10.1
9.93	17.47	33.9	8.53	15.25	8.89
4.69	2.44	13.22	1.36	9.67	5.81
8.39	0.92	1.98	5.36	20.14	0.31
32.62	1.55	14.27	10.27	37.93	7.89
25.22	2.06	34.73	12.36	69.01	1.15
9.17	2.8	57.7	1.84	5.64	42.67
5.71	1.31	58.73	0.3	1.02	19.35
44.39	7.85	73.36	11.15	14.44	2.76
4.7	4.41	1.68	2.51	13.72	38.52
7.65	4.04	2.76	1.92	4.36	12.34
8.44	11.92	4.88	34.1	22.54	16.48
1.75	28.3	2.89	1.36	33.69	0.22
1.92	8.86	19.86	0.93	14.62	0.78
20.13	42.08	11.08	8.92	2.01	0.54
12.76	10.83	0.57	7.12	6.76	8.93
21.28	58.11	0.36	29.52	12.17	5.31
2.03	0.54	0	18.67	1.77	2.55
6.97	38.86	12.43	6.49	37.92	3.22
46.31	35.11	4.08	5.99	63.11	2.87
19.86	10.6	12.12	9.46	4.99	9.87
0.57	39.59	1.26	0.88	2.33	24.95
5.04	23.73	13.49	4.02	33.88	5.98
34.21	3.7	0.71	21.53	12.48	3.32
23.28	1.27	2.41	42.49	42.66	3.19
1.3	1.98	54.61	1.48	19.45	0.34
52.29	22.91	7.97	49.47	3.17	9.61
29.06	3.98	27.92	2.25	18.21	11.5
0	1.78	3.46	4.15	19.69	2.79
5.75	0	3.47	16.25	65.56	34.93
9.76	2.74	12.13	8.95	1.77	2.42
3.39	0.71	66.08	45.3	10.89	0.57
20.58	9.12	48.6	3.84	10.33	15.13
8.56	3.89	3.93	0	28.47	5.91
1.96	15.6	20.14	14.3	26.27	10.75
1.35	38.98	3.78	33.88	36.38	14.23
1.62	15.52	46.36	47.68	19.25	0.4
1.4	6.08	1.97	14.85	4.19	8.42
4.82	8.65	3.09	4.62	9.23	5.63
0.3	0.45	2.17	26.68	4.18	4.77
3.07	35.07	1.5	12.46	8.99	2.07
5.64	4.33	12.18	3.63	34.13	2.17
12.87	2.79	13.38	72.91	32.34	9.45
0.75	37.25	13.49	22.01	0.74	12.15
3.26	16.45	3.09	8.03	14.69	3.21
3.75	4.43	4.96	3.8	3.86	4.18
3.14	57.03	34.41	16.78	12.99	0
21.36	42.37	51.22	15.2	5.41	5.71
3.12	25.4	41.28	14.54	4.09	21.56
3.46	6.86	20.51	9.65	11.78	59.6
13.39	15.89	56.5	2.81	14.21	8.09
42.89	1.75	39.04	11.32	7.55	2.5
53.79	19.44	34.76	14.12	2.18	16.95
34.54	43.31	22.72	39.92	21.58	35.41
43.77	0.92	5.04	18.11	14.06	0
23.52	1.62	6.83	2.58	6.38	6.66
5.86	42.01	1.5	9.17	47.65	1.79
9.28	36.39	1.08	35.41	20.87	5.91
9.79	1.21	2.23	3.78	7.67	0
		0.65	16.81	17.9	2.61
		1.32	2.8	24.31	5.65
		1.04	30.73	15.76	15.6
		6.65	1.54	10.48
		0.42	2.94	10.85
		0.22	31.94	0.33
		0.97	2.9	9.02
		25.17	41.14	8.83
		10.21	25.86	24.76
		15.67	26.33	16.89
		7.44	17.48	12.51
		6.3	35.78	50.48
		4.76	27.84	1.05
		1.58	17.38	2.75
		0.01	8.08	22.62
		1.15	19.43	41.69
		4.53	38.16	6.42
		1.78	9.31	5.76
		3.99	27.81	4.15
		16.99	29.13	22.73
		3.59	8.02	30.99
		7.7	0.14	13.32
		19.29	6.15	29.56
		4.54	8.68	15.39
		12.38	51.89	34.86
		8.63	24.24	2.68
		1.29	10.55	25.88
		15.65	3.41	73.6
		17.63	0.48	6.97
		38.72	7.29	55.97
			14.7	25.78
			11.4	7.7
			3.58	8.26
			6.21
			13.09
			8.09
			28.7
			7.98
			21.91
			5.08
			6.05
			12.69
			0.32
			7.26
			9.88
			15.37
			32.38
			9.41
			4.43
			32.13
			16.31
			7.26
			56.78
			7.66
			25.62
			40.89
			27.46
			12.5
			18.16
			23.84
			3.38
			9.26
			5.54
			19.24
			8.57
			27.25
			25.63
