# Supplementary material for: Ongoing repair of migration-coupled DNA damage allows planarian adult stem cells to reach wound sites
Source: eLife journal article supplement (doi:10.7554/elife.63779), 2021-04-23
Supplement: fig2-figsupp3-data1 [file Fig2_sourcedata_8_panel_F.xlsx]

## Sheet: Panel_F
COMET assay data			% DNA in tail in individual comet
Graph-F
	Migratory tissue (7 dpa)
n=200	n=224	n=200	n=247	n=350	n=335
InM5 (200)	InM6 (224)	InM7 (200)	WoM5 (247)	WoM7 (350)	WoM8 (335)
16.31	11.48	6.06	26.85	9.8	15.09
0.45	6.96	12.84	6.87	23.49	8.69
11.62	4.87	24.51	23.77	26.49	1.27
6.49	3.19	10.12	24.55	72.83	10.68
8.33	8.44	11.81	47.98	4.27	17.9
23.2	35.87	16.87	10.5	13.02	13.31
9.26	1.87	10.87	16.42	32.2	43.05
3.57	6.49	8.99	22.6	31.77	11.66
13.46	1.83	0.59	19.54	11.53	54.32
49.87	15.95	16.33	29.15	67.44	58.27
16.87	9.51	12.41	29.12	41.08	42.87
21.68	8.98	5.88	14.63	47.62	22.67
11.49	13.94	11.95	3.05	59.51	10.19
26.97	15.69	11.34	24.11	40.21	4.6
7.91	4.75	5.18	0	55.7	20.02
34.15	6.29	6.56	22.94	49.26	26.88
41.57	5.79	32.28	35.8	27.27	6.9
10.79	11.55	16.51	19.44	61.12	31.23
13.25	17.56	7.17	23.04	31.37	13.82
28.37	5.87	2.51	27.06	55.18	1.19
11.91	13.44	27.53	42.58	31.28	6.27
13.19	2.95	12.09	68.05	35.53	15.03
14.86	8.75	31.82	10.95	21.19	15.49
16.18	4.62	7	51.75	36.66	36.63
11.26	38.6	3.01	3.45	4.89	29.64
23.81	10.73	15.73	45.51	24.95	36.45
19.47	11.25	6.37	4.52	47.74	58.33
1.4	11.53	2.67	1.67	33.13	15.57
17.47	4.12	24.44	26.17	33.66	37.16
19.6	19.82	5.73	50.28	59.21	33.51
22.42	30.28	10.55	46.55	17.65	16.98
32.09	19.33	8.89	58.59	1.49	46.68
22.98	4.18	9.07	29.66	65.18	28.47
21.34	6	9.94	54.76	48.56	28.68
9.62	8.71	6.85	13.58	62.06	18.06
5.91	9.18	5.59	16.68	64.24	9.74
17.85	25.06	35.03	13.01	69.46	20.42
8.85	16.8	23.87	58.08	57.62	50.88
16.23	31.65	9.3	18.3	61.53	1.38
3.13	30.53	4.88	2.9	65.18	31.5
23.2	19.77	10.17	15.31	36.61	20.45
7.03	47.09	0.58	5.62	66.63	66.33
8.01	0.82	28.66	39.35	69.02	27.34
23.27	1.98	13.5	50.44	17.24	5.82
13.54	2.52	7.18	55.23	22.53	4.66
15.22	5.09	0.46	18.55	29.43	10.2
0.68	20.61	1.92	45.85	22.81	29.54
30.2	8.14	16.23	14.97	14.44	4.08
12.58	18.8	37.28	60.53	20.77	17.11
16.69	8.38	9.44	14.64	4.02	38.28
16.51	25.58	1.55	37.49	0.23	19.3
32.04	48.72	21.47	67.11	3.17	22.05
29.42	0.2	17.64	53.42	15.18	23.91
28.33	8.99	39.91	29.33	11.81	6.27
0.02	33.48	8.79	23.56	19.81	15.93
0.13	11.68	28.52	28.49	36.15	25.69
8.48	1.38	32.5	43.7	14.97	22.94
9.61	5.02	8.28	29	38.1	17.59
19.87	20.37	16.74	0.89	7.04	2.76
43.99	7.62	10.74	46.48	82.52	13.41
11.21	19.46	18.35	30	8.16	36.27
15.73	7.7	0	14.31	19.82	25.55
5.74	24.33	5.69	18.53	57.31	27.24
3.99	8.89	19.82	8.31	16.08	9.71
5.81	0.5	1.8	38.9	21.16	22.65
33.17	8.85	22.86	56.31	29.39	8.44
8.9	17.07	12.95	4.63	12.99	30.18
7.02	3.56	15.79	0.07	6.05	32.21
9.51	7.34	19.22	11.94	60.14	33.81
5.95	29.65	11.93	17.39	46.91	15.99
5.04	14.11	2.26	15.58	44.08	60.89
1.71	5.84	15.15	42.45	66.34	38.97
9.16	0	33.71	29.64	23.03	32.93
21.67	2.43	28.08	36.65	44.26	62.9
19.91	12.27	12.62	27.93	20.3	60.19
4.04	5.93	17.18	49.13	10.25	28.23
30.96	19.82	11.49	30.54	43.37	42.42
16.07	46.02	25.09	39.95	7.57	36.7
26.86	28.33	37.09	1.76	1.93	8.68
19.76	6.39	29.81	15	29.76	12.34
37.93	11.93	40.95	19.97	46.82	24.73
8.05	8.26	12.25	46.5	37.36	40.04
10.2	30.68	42.51	20.17	11.52	45.01
7.13	1.38	22.15	53.47	48.44	8.19
23.17	33.89	13.75	16.78	29.64	37.42
3.65	19.48	21.24	32.62	40.03	67.48
24.03	5.6	15.93	38.63	20.76	34.26
8.2	15.73	19.72	41.73	64.17	55.77
29.73	6.03	40.96	9.02	27.93	40.91
14.57	23.48	8.04	30.8	31.91	42.14
28.34	2.58	9.46	38.02	33.03	59.5
41.74	5.47	71.93	49.94	20.15	57.99
12.48	12.23	14.96	17.11	18.41	39.09
43.33	0	23.44	2.49	33.17	49.56
36.09	6.61	45.82	19.07	10.78	76.42
0	29.21	35.39	6.68	52.2	50.76
34.22	14.78	12.56	40.73	2.98	27.82
34.44	38.71	8.52	56.98	0.41	73.6
37.84	19.2	73.77	64.04	7.07	2.23
18.8	44.13	35.36	25.76	8.18	6.08
5.71	2.13	52.03	49.41	18.97	40.8
13.39	2.07	71.35	56.51	44.49	35.76
13.86	7.98	2.29	68.37	1.85	24.72
3.39	4.23	16.89	46.88	40.76	8.71
46.83	5.23	3.61	3.28	5.42	25.89
9.44	2.31	15.95	7.91	8.21	1.46
13.98	13.44	4.15	13.76	32.7	13.76
7.99	3.12	14.95	17.65	2.68	5.08
20.41	14.11	18.88	15.01	43.36	2.59
0.66	7.42	14.35	2.81	72.55	13.86
30.59	31.25	0	24.28	26.55	36.95
3.1	4.82	22.16	17.31	51.15	33.05
5.17	3.98	60.41	26.1	6.37	33.81
14.74	1.21	14.67	5.69	6.05	41.97
0.37	1.2	9.62	5.68	76.36	47.11
9.12	8.45	1.5	1.29	82.7	47.28
18.95	19.49	12.93	5.55	38.49	23.36
7.54	7.96	22.11	9.12	44.28	18.26
11.12	14.21	3.84	0.64	20.07	19.46
0.58	12.22	7.22	23	46.54	6.74
29.24	2.22	27.85	0.94	62.56	7.63
20.31	10.74	4.98	3.15	42.43	6.69
9.68	16.09	6.63	16.42	73.42	24.41
10.96	7.53	10.39	6.91	75.69	28.53
2.92	25.26	6.13	8.43	18.75	38.6
15.58	5.55	13.03	15.01	27.18	1.69
12.67	44.47	5.12	58.1	1.77	14.64
25.23	14.83	5.19	43.05	58.37	16.05
26.04	35.45	3.18	0.04	61.69	7
30.01	11.87	31.69	10.58	23.92	0.59
43.71	21.43	15.74	30.47	30.29	13.49
39.85	6.18	23.27	4.18	40.42	9.49
25.5	23.99	19.97	4.04	14.35	38.41
12.94	8.39	5.7	13.9	3.96	1.13
21.96	20.06	15.59	4.4	2.18	4
28.65	33.52	14.16	8.39	36.47	68.05
26.62	2.89	14.64	29.44	45.96	53.58
29.97	7.59	25.24	0.94	0.4	85.16
45.81	8.63	25.59	16.42	63.91	63.12
36.92	4.37	4.62	5.75	27.03	19.66
10.66	19.29	30.82	18.63	14.24	33.78
16.55	24.05	18.02	43.23	17.82	74.2
1.15	1.94	29.46	24.39	60.46	9.67
7.45	28.11	3.55	22.19	28.91	5.76
21.38	32.1	36.44	19.03	58.58	21.52
11.84	29.32	5.72	26.74	18.58	13.64
27.89	14.52	25.42	4.69	2.41	10.78
7.8	36.61	2.09	11.04	49.84	33.41
10.39	40.93	44.14	8.22	42.19	2.51
25.57	36.08	20.1	5.52	36.13	13.36
5.21	8.21	28.77	28.68	65.77	28.25
19.39	17.94	43.5	5.72	72.12	8.05
18.05	3.84	2.43	38.97	23.77	12.88
25.73	1.05	21.89	23.2	29.67	46.65
34.25	11.2	30.72	35.14	13.57	10.03
13.41	47.22	15.92	28.39	40.66	31.94
38.91	0.39	20.45	38.86	33.66	12.43
32.28	12.5	9.19	10.06	32.85	10.51
6.78	20.7	9.13	2.29	63.82	20.39
16.68	16.35	9.31	43.71	61.18	9.33
0.47	29.74	16.62	47.82	22.12	4.8
15.93	16.25	32.3	11.99	28.48	6.74
15.36	1.86	11.26	20.12	45.45	34.86
17.25	15.01	3.01	0.89	35.68	3.6
11.01	6.02	38.68	27.47	26.06	11.36
5.68	6.3	20.06	9.28	20.99	47.45
10.07	8.12	7.7	10.36	29.98	24.8
9.7	0.88	13.97	0	59.68	19.38
7.47	9.25	31.26	14.17	57.47	20.92
16.7	16.15	19.4	27.16	35.44	23.44
14.96	1.54	11.83	9.03	33.21	19.49
24.83	18.63	5.93	45.68	25.17	56.72
9.17	3.59	7.59	15.9	8.64	35.4
27.09	22.06	15.72	25.85	11.34	51.47
4.07	26.48	10.71	5.72	33.46	22.42
18.31	6.71	9.74	6.21	28.5	32.34
20.04	24.07	14.69	1.2	11.46	31.21
11.26	15.84	4.43	10.29	54.61	53.42
9.06	18.35	3.64	18.5	58.69	41.27
27.84	44.94	7.24	2.23	56.2	50.58
5.13	13.55	34.64	45.27	27.45	45.89
6.26	5.38	20.17	39.71	16.48	38.18
26.83	6.8	18.66	51.23	29.44	21.34
17.13	28.47	23.08	21.96	1.81	2.18
3.05	33.87	1.88	54.6	40.68	19.85
46.14	14.15	25.98	8.8	34.51	23.95
14.49	26.83	31.01	13.31	50.95	40.99
46.65	21.77	49.94	29.7	62.56	31.96
46.5	9.4	27.8	2.9	56.07	38.42
15.5	17.27	7.92	21.45	8.17	21.35
11.54	11.2	35.13	43.29	19.21	26.6
10.07	8.36	25.83	24.32	22.05	20.23
27.67	5.97	1.92	16.7	52.54	63.21
21.74	13.09	24.2	9.2	5.66	40.12
16.61	13.37	8.69	25.11	0	20.55
26.51	12.27	27.59	18.85	13.33	19.39
17.84	9.12	37.27	3.06	68.25	10.04
33.16	6.86	2.12	16.4	40.78	19.21
24.59	4.83	2.61	34.84	8.84	1.83
42.12	26.45	13.4	38.81	7.91	9.76
	1.48		14.48	10.39	26.23
	6.23		9.11	58.94	18.42
	15.25		0.22	49.76	35.7
	2.59		5.28	8.1	33.62
	9.99		15.46	11.83	42.69
	12.13		13.63	29.72	11.01
	7.65		26.66	16.8	7
	7.83		43.87	13.57	23.52
	10.06		17.42	20.54	10.76
	2.16		16.7	16.49	17.29
	0		11.82	6.17	28.7
	19.14		2.18	21.41	44.32
	27.41		34.57	34.65	5.33
	15.35		19.47	17.49	12.46
	58.91		8.46	24.06	3.12
	24.73		27.35	27.56	7.96
	35.07		25.52	35.07	6.43
	24.4		10.09	59.08	10.15
	28.08		17.35	27.79	14.4
	5.17		39.33	11.45	8.54
	45.86		38.17	56.82	2.9
	36.11		51.96	16.32	21.85
	29.14		0	3.23	33.36
	38.76		30.44	16.51	35.89
			28.53	32.72	63.45
			13.08	2.8	35.57
			11.64	47.28	31.47
			6.81	52.99	56.74
			28.06	34.72	8.15
			20.23	32.58	14.55
			7.56	34.98	31.58
			43.09	47.53	5.95
			2.14	31.65	21.07
			4.28	52.35	66.49
			24.41	18.68	34.42
			13.37	42.64	26
			23.97	61.47	60.17
			7.56	51.3	47.7
			0.62	20.97	15.09
			15.46	22.71	22.2
			4.51	60.92	19
			5.13	49.45	23.01
			21.17	45.95	30.43
			2.24	58.56	48.06
			6.5	20.67	31.11
			28.85	35.34	4.3
			35.6	58.28	47.67
				54.64	7.2
				48.73	12.06
				23.78	34.13
				5.79	30.38
				53.64	48.51
				67.88	0.96
				59.16	28.86
				0.87	14.76
				0.7	33.08
				1.27	69.3
				22.54	64.04
				0.51	81.02
				0.26	58.24
				66.48	17.06
				45.71	19.84
				52.85	2.47
				47.75	14.68
				1.81	30.16
				2.99	37.6
				1.64	46.7
				1.57	29.03
				5.12	34.68
				3.44	9.58
				11.16	52.87
				13.68	6.12
				1.4	27.91
				1.28	40.48
				1.21	18.52
				50.23	21.39
				53.12	48.02
				40.25	61.95
				36.11	54.09
				6.53	23.18
				7.86	6.29
				0	30.93
				1.26	38.03
				6.41	9.65
				5.6	39.08
				7.32	55.5
				13.54	42.82
				15.06	20.36
				0.85	22.84
				13.39	18.78
				3.32	7.54
				68.64	12.34
				25.49	9.84
				1.16	9.82
				29.65	10.86
				25.04	19.16
				9.4	18.34
				14.13	59.89
				9.96	49.37
				7.49	50.98
				7.93	8.02
				9.35	61.7
				47.43	3.17
				24.52	7.68
				29.46	0.32
				69	4.72
				2.74	62.45
				3.79	5.9
				2.54	20
				4.64	26.11
				62.31	11.45
				63.2	0
				43.38	40.83
				33.73	9.04
				59.15	2.75
				63.32	10.31
				33.14	5.94
				51.1	21.17
				31.69	59.85
				63.09	25.5
				71.11	31.72
				49.9	48.76
				53.38	55.43
				58.04	48.39
				1.09	63.88
				0.05	36.54
				65.31	11.97
				53.26	22.71
				2.21	28.32
				49.04	45.15
				57.87	49.4
				53.5	38.36
				55.44	22.86
				31.22	45.85
				30.18	4.71
				38.13
				41.83
				62.06
				28.77
				41.26
				50.7
				63.22
				40.2
				26.45
				50.43
				49.07
				27.39
				46.89
				31.13
				58.67
