# Supplementary material for: Ongoing repair of migration-coupled DNA damage allows planarian adult stem cells to reach wound sites
Source: eLife journal article supplement (doi:10.7554/elife.63779), 2021-04-23
Supplement: fig3-data1 [file Fig3_source data_1_3D.xlsx]

## Sheet: Panel 3D
Effect of irradiation in stem cell migration
Distance migrated by individual cells
0Gy
4dpa/5dpi	155.25	160.22	164.56	168.29	143.45	135.38	133.52	121.72	119.34	108.67	139.1	131.03	101.22	81.35	65.83	63.96	62.13	64.58	59.88	58.12	197.06	152.35	142.42	126.88	129.17	81.97	65.41	52.16	38.92	38.92	171.4	147.38	119.23	103.5	96.05	83.63	80.32	77.54	74.23	71.14	146.56	124.2	114.26	110.95	103.5	110.12	91.08	87.77	78.66
6dpa/7dpi	198.25	182.99	99.36	84.46	81.14	62.11	65.42	48.85	62.1	45.54	278.21	246.74	202.3	169.74	158.15	178.85	139.93	121.23	113.32	108.65	208.66	168.26	144.07	111.78	92	88	81.24	87.77	86.94	85.65	175.54	169.74	129.17	125.03	110.12	90.25	96.05	94.12	84.23	81.24	147.18	140.97	97.5	91.29	89.42	61.48	62.72	46.58	45.95
5 Gy
4dpa/5dpi	137.24	111.78	104.33	57.75	55.89	28.57	24.22	21.12	15.24	11.14	172.35	154.01	128.55	110.23	114.89	27.33	38.5	19.25	13.04	12.42	120.89	105.9	91.91	61.89	42.02	41	36.44	27.12	28.9	21.12	142.83	120.47	96.88	84.13	44.71	45.95	32.29	25.1	21.15	28.59	88.18	78.25	70.79	56.51	52.78	42.23	39.74	37.27	26.7
6dpa/7dpi	152.43	126.88	113.85	74.11	60.86	53.41	42.23	45.96	36.85	45.96	95.22	69.76	68.1	85.49	78.4	63.14	68.93	65.62	67.27	62.34	126.68	94.39	82.8	77.83	61.2	57.96	47.2	40.57	36.43	43.89	112.82	94.6	85.49	75.56	64.79	68.93	70.59	64.79	59.82	54.23	89.42	90.67	75.76	73.28	54.65	48.44	34.8	60.86	31.23
10 Gy
4dpa/5dpi	90.25	81.97	62.1	52.16	37.26	11.59	22.45	19.87	9.94	8.12	24.23	20.29	14.24	9.52	0	0	0	0	0	0	0	0	0	0	0	0	0	0	0	0
6dpa/7dpi	58.99	47.2	53.41	42.23	28.57	29.81	23.6	14.9	11.2	12.1	62.1	51.34	45.54	51.34	45.54	38.92	29.81	28.99	10.12	8.92	131.24	101.25	42.23	39.74	39.74	31.05	19.25	11.8	3.1	3.1
	Multiple t Test using Holm-sidak method
	Significant?	P value	Mean of 0 Gy	Mean of 10 Gy	Difference	SE of difference	t ratio	df
4dpa/5dpi	Yes	<0.000001	106.644	61.8148	44.8294	8.17137	5.48615	98
6dpa/7dpi	Yes	<0.000001	115.653	69.7012	45.9514	8.49363	5.4101	98
	Significant?	P value	Mean of 0 Gy	Mean of 10 Gy	Difference	SE of difference	t ratio	df
4dpa/5dpi	Yes	<0.000001	106.644	15.4663	91.1779	7.82549	11.6514	78
6dpa/7dpi	Yes	<0.000001	115.653	37.2377	78.4149	10.6464	7.36541	78
[truncated: 1 more columns]
