# Supplementary material for: Ongoing repair of migration-coupled DNA damage allows planarian adult stem cells to reach wound sites
Source: eLife journal article supplement (doi:10.7554/elife.63779), 2021-04-23
Supplement: fig3-data1 [file Fig3_source data_2_3L.xlsx]

## Sheet: Fig.3L
Fig 3L
Stem cell density per worm (n=5 per condition)
0Gy Unirradiated							Two-way ANOVA
Mig	1311.61	1547.97	1866.35	852.348	1998.09		Tukey's multiple comparisons test	Mean Diff.	95.00% CI of diff.	Significant?	Summary
Shield	2435.28	2173.75	2202.82	2382.34	2490.63
							Mig:0 Gy vs. Mig:5 Gy	1128	636.6 to 1619	Yes	****
5 Gy							Shield:0 Gy vs. Shield:5 Gy	440.8	-50.58 to 932.2	No	ns
Mig	232.458	417.184	406.206	570.884	309.945
Shield	1516.52	1921.24	2031.03	2074.94	1937.15		Test details	Mean 1	Mean 2	Mean Diff.
							Mig:0 Gy vs. Mig:5 Gy	1515	387.3	1128
							Shield:0 Gy vs. Shield:5 Gy	2337	1896	440.8
							Source of Variation	% of total variation	P value	P value summary	Significant?
							Interaction	5.073	0.0121	*	Yes
							Row Factor	58.35	<0.0001	****	Yes
							radiation	26.44	<0.0001	****	Yes
