# Supplementary material for: Ongoing repair of migration-coupled DNA damage allows planarian adult stem cells to reach wound sites
Source: eLife journal article supplement (doi:10.7554/elife.63779), 2021-04-23
Supplement: fig3-data1 [file Fig3_source data_3_3M.xlsx]

## Sheet: Sheet1
Fig 3M
DISTANCE MIGRATED bySC
0Gy
	migIR_0gy_7dpa_1	327.89	232.88	214.25	190.03	175.12	143.78	240.33	208.66	186.3	267.34	236.62
	migIR_0gy_7dpa_2	877.46	712.23	612.3	547.72	419.98	460.16	459.12	413.23	359.56	358.12	303.67
	migIR_0gy_7dpa_3	561.39	531.23	408.62	373.84	365.15	339.07	381.29	342.79	345.12	341.12	335.14
	migIR_0gy_7dpa_4	635.91	505.5	490.59	418.55	381.3	442.12	498.05	340.31	306.77	264.55	304.29
	migIR_0gy_7dpa_5	571.94	564.49	415.45	414.23	443.45	413.87	342.8	341.54	320.44	303.67	294.35
5 Gy
	migIR_5gy_7dpa_1	391.23	206.17	182.58	201.21	94.37	100.13	105.23	82.23	76.34	75.23	79.12
	migIR_5gy_7dpa_2	437.18	382.54	290.63	288.21	281.23	231.02	229.14	208.66	199.96	201.22	198.14
	migIR_5gy_7dpa_3	444.64	355.21	325.41	229.77	213.63	146.56	192.51	161.46	156.5	151.23	149.56
	migIR_5gy_7dpa_4	253.37	278.12	261.1	226.05	224.13	204.93	206.17	198.72	156.49	183.32	170.14
	migIR_5gy_7dpa_5	309.26	228.54	296.84	278.21	232.26	212.39	178.85	176.37	175.43	177.12	175.53
Unpaired tTest
distance migrated 0 Gy vs 5Gy
P value	<0.0001
P value summary	****
Significantly different (P < 0.05)?	Yes
