# Supplementary material for: Ongoing repair of migration-coupled DNA damage allows planarian adult stem cells to reach wound sites
Source: eLife journal article supplement (doi:10.7554/elife.63779), 2021-04-23
Supplement: fig3-figsupp1-data1 [file Fig3_source data_4_Panel I.xlsx]

## Sheet: Panel I
Effect of IR on migrating stem cels
Distance migrated by invidual stem cells
0 Gy	5 Gy				Unpaired t test with Welch's correction
507.98	374.46				P value	0.4898
494.32	305.53				P value summary	ns
460.78	288.76				Significantly different (P < 0.05)?	No
432.22	283.18				One- or two-tailed P value?	Two-tailed
424.76	212.38				Welch-corrected t, df	t=0.6933, df=93.63
380.05	203.7
365.15	180.71
291.87	152.78
296.43	122.96
285.66	162.08
223.56	180.72
239.71	177.32
234.74	178.23
540.27	575.67
452.09	536.54
437.18	549.59
434.09	523.52
340.31	460.16
321.68	430.36
279.45	411.72
255.86	393.09
251.32	424.76
252.13	383.78
242.32	381.23
244.32	377.18
245.12	377.89
756.79	433.46
632.12	443.39
547.31	358.98
505.4	353.97
461.2	361.42
457.88	353.97
432.22	336.58
414.83	298.08
413.21	312.98
415.66	310.5
387.43	276.97
416.21	275.74
389.21	274.87
383.78	440.91
332.88	334.1
303.6	295.6
244.69	274.48
180.09	269.51
157.74	265.79
125.45	261.23
124.21	266.31
108.6	251.98
131.65	257.45
112.56	245.62
118.23	241.43
101.23	247.98
