# Supplementary material for: Ongoing repair of migration-coupled DNA damage allows planarian adult stem cells to reach wound sites
Source: eLife journal article supplement (doi:10.7554/elife.63779), 2021-04-23
Supplement: fig3-figsupp1-data1 [file Fig3_source data_5_Panel J.xlsx]

## Sheet: Panel J
Migratory cell senstivity to IR
0 Gy								Two-way ANOVA
Mig	763.792	974.112	1482.11	475.986	1185.59
Shield	2081.06	1995.99	1959.29	2180.68	2122.36			Number of families	1
								Number of comparisons per family	6
								Alpha	0.05
5 Gy
Mig	910.396	428.163	1262.53	1439.38	214.375			Tukey's multiple comparisons test	Mean Diff.	95.00% CI of diff.	Significant?	Summary
Shield	1296.33	1494.38	1799.33	1868.13	1324.59
								Mig:0 Gy vs. Mig:5 Gy	125.3	-516.4 to 767.1	No	ns
								Shield:0 Gy vs. Shield:5 Gy	511.3	-130.4 to 1153	No	ns
