# Supplementary material for: Ongoing repair of migration-coupled DNA damage allows planarian adult stem cells to reach wound sites
Source: eLife journal article supplement (doi:10.7554/elife.63779), 2021-04-23
Supplement: fig4-data1 [file Fig4_source data_1_4H.xlsx]

## Sheet: Panel 4H
Fig 4 H
Density of smedwi-1+ cells in RNAI worms
Density of stem cels in the shield						One way ANOVA
7dpa worms	Area	piwi+cells	cells/umm2	cells/mm2		Tukey's multiple comparisons test	Mean Diff.	95.00% CI of diff.	Significant?	Summary	Adjusted P Value
GFP_7dpa_1	40483.1	101	0.00249487	2494.87		GFP vs. ATR	19.76	-442.6 to 482.1	No	ns	>0.9999
GFP_7dpa_2	40483.1	95	0.00234666	2346.66		GFP vs. BRCA2	286.5	-175.8 to 748.9	No	ns	0.3722
GFP_7dpa_3	40483.1	90	0.00222315	2223.15		GFP vs. PARP1	-83.99	-546.4 to 378.4	No	ns	0.9815
GFP_7dpa_4	40483.1	88	0.00217375	2173.75		GFP vs. ATM	29.64	-432.7 to 492.0	No	ns	0.9997
GFP_7dpa_5	40483.1	107	0.00264308	2643.08		ATR vs. BRCA2	266.8	-195.6 to 729.1	No	ns	0.4411
						ATR vs. PARP1	-103.7	-566.1 to 358.6	No	ns	0.9603
						ATR vs. ATM	9.881	-452.5 to 472.2	No	ns	>0.9999
ATR_7dpa_1	40483.1	104	0.00256898	2568.98		BRCA2 vs. PARP1	-370.5	-832.9 to 91.84	No	ns	0.1567
ATR_7dpa_2	40483.1	109	0.00269248	2692.48		BRCA2 vs. ATM	-256.9	-719.3 to 205.5	No	ns	0.4776
ATR_7dpa_3	40483.1	99	0.00244547	2445.47		PARP1 vs. ATM	113.6	-348.7 to 576.0	No	ns	0.9456
ATR_7dpa_4	40483.1	91	0.00224785	2247.85
ATR_7dpa_5	40483.1	74	0.00182793	1827.93
brca2_7dpa_1	40483.1	96	0.00237136	2371.36
brca2_7dpa_2	40483.1	89	0.00219845	2198.45
brca2_7dpa_3	40483.1	90	0.00222315	2223.15
brca2_7dpa_4	40483.1	70	0.00172912	1729.12
brca2_7dpa_5	40483.1	78	0.00192673	1926.73
parp1_7dpa_1	40483.1	101	0.00249487	2494.87
parp1_7dpa_2	40483.1	102	0.00251957	2519.57
parp1_7dpa_3	40483.1	104	0.00256898	2568.98
parp1_7dpa_4	40483.1	97	0.00239606	2396.06
parp1_7dpa_5	40483.1	94	0.00232196	2321.96
ATM_7dpa_1	40483.1	99	0.00244547	2445.47
ATM_7dpa_2	40483.1	102	0.00251957	2519.57
ATM_7dpa_3	40483.1	100	0.00247017	2470.17
ATM_7dpa_4	40483.1	98	0.00242077	2420.77
ATM_7dpa_5	40483.1	76	0.00187733	1877.33
