# Supplementary material for: Ongoing repair of migration-coupled DNA damage allows planarian adult stem cells to reach wound sites
Source: eLife journal article supplement (doi:10.7554/elife.63779), 2021-04-23
Supplement: fig4-data1 [file Fig4_source data_2_4I.xlsx]

## Sheet: Panel 4I
Role of DNA repair genes in stem cell migration
75 cells from 5 individual worms are counted per RNAi condition
Control (RNAi)	atr (RNAi)	atm (RNAi)	brca2 (RNAi)	parp1 (RNAi)		One way ANOVA
400.55	283.18	428.29	264.13	134.14		Tukey's multiple comparisons test	Mean Diff.	95.00% CI of diff.	Significant?	Summary	Adjusted P Value
379.43	273.24	388.75	262.48	127.3		Control (RNAi) vs. atr (RNAi)	295.9	265.8 to 325.9	Yes	****	<0.0001
349.62	187.13	347.76	167.26	118.61		Control (RNAi) vs. atm (RNAi)	167.1	137.0 to 197.2	Yes	****	<0.0001
369.5	176.36	285.66	144.07	106.81		Control (RNAi) vs. brca2 (RNAi)	225.5	195.4 to 255.5	Yes	****	<0.0001
360.8	149.87	276.97	127.51	93.77		Control (RNAi) vs. parp1 (RNAi)	261.8	231.8 to 291.9	Yes	****	<0.0001
339.69	121.72	259.88	143.24	61.48
301.19	106.81	244.67	144.9	59.62
316.69	99.36	267.03	141.59	54.65
278.83	96.05	262.06	118.4	39.74
282.56	78.66	226.04	104.33	62.72
283.8	72.04	227.29	91.91	56.51
280.07	57.13	207.41	89.42	33.53
268.89	60.44	209.9	82.8	35.4
252.75	47.2	196.24	69.55	34.78
248.43	55.48	195.76	91.91	45.95
432.22	114.26	375.08	326.65	215.49
429.73	100.6	283.18	312.98	210.52
444.64	64.58	272	267.03	211.14
426.01	72.04	249.64	219.83	146.56
398.68	62.1	229.77	182.57	148.42
389.14	45.95	235.98	175.12	145.94
383.78	59.62	229.77	165.19	124.2
361.42	60.86	192.51	163.94	120.47
339.07	38.5	299.32	144.07	121.09
353.97	34.78	259.58	136.62	93.15
360.18	26.08	192.51	142.83	98.74
347.76	31.05	177.61	108.5	105.57
332.86	16.34	185.02	91.91	86.94
325.4	9.94	178.23	91.91	95
316.71	10.23	175.23	98.12	98.12
430.97	104.33	345.28	224.8	183.2
366.39	86.11	335.24	229.1	172.64
332.86	85.2	351.49	209.28	165.81
331.61	72.04	303.05	206.17	153.39
316.71	71.42	305.53	191.27	128.55
303.5	75.14	305.4	180.71	129.79
293.11	50.3	267.6	170.78	96.25
286.9	47.3	273.24	160.84	77.62
275.72	49.68	253.57	150.28	70.17
264.55	39.6	260.2	145.31	79.49
282.53	45.33	245	137.24	77.62
262.06	46.58	231	122.96	67.07
257.1	37.88	221	104.95	62.72
240.95	27.23	221.5	96.88	60.86
247.16	26.08	200.89	101.23	63.96
589.95	185.68	226.6	222.32	201.2
527.85	165.81	188.16	146.56	199.96
542.75	153.39	158.35	150.28	111.78
565.11	129.79	153.39	173.88	114.26
542.75	126.06	144.07	170.15	110.54
454.57	124.82	140.97	144.07	105.57
435.94	111.15	134.14	131.6	115.51
413.59	95.01	122.96	122.96	70.79
403.65	96.25	122.34	125.34	78.25
406.13	87.56	122.35	110.54	70.79
401.17	113.64	101.84	105.57	74.52
378.81	116.31	91.91	96.88	69.55
351.49	70.17	75.14	110.54	58.37
339.07	86.32	91.29	99.36	55.89
341.12	83.83	83.21	86.94	53.41
491.42	61.48	399.72	240.33	217.35
485.62	35.4	147.18	249.02	187.54
478.35	35.4	127.3	198.1	185.06
473.2	29.19	119.85	149.66	165.19
470.72	114.89	134.76	144.69	151.52
473.2	97.5	141.38	142.21	155.25
415.24	71.42	118.2	139.72	157.73
420.21	72.66	104.95	128.55	154.01
429.32	20.49	108.26	126.06	155.25
416.9	31.67	103.24	124.82	140.35
409.45	34.6	123.99	99.98	142.83
411.93	39.14	95.84	96.25	156.49
415.24	38.12	93.36	104.95	147.8
428.49	34.12	89.22	112.4	124.2
406.13	39.1	89.22	98.74	122.96
